# Supplementary figures and images for: SOD-FE: A Supervised Outlier Detection and Feature Engineering Approach for Student Dropout Prediction
Source: Research Square preprint supplement (doi:10.21203/rs.3.rs-6889300/v1), 2025-06-20

PCA Projection (2D)

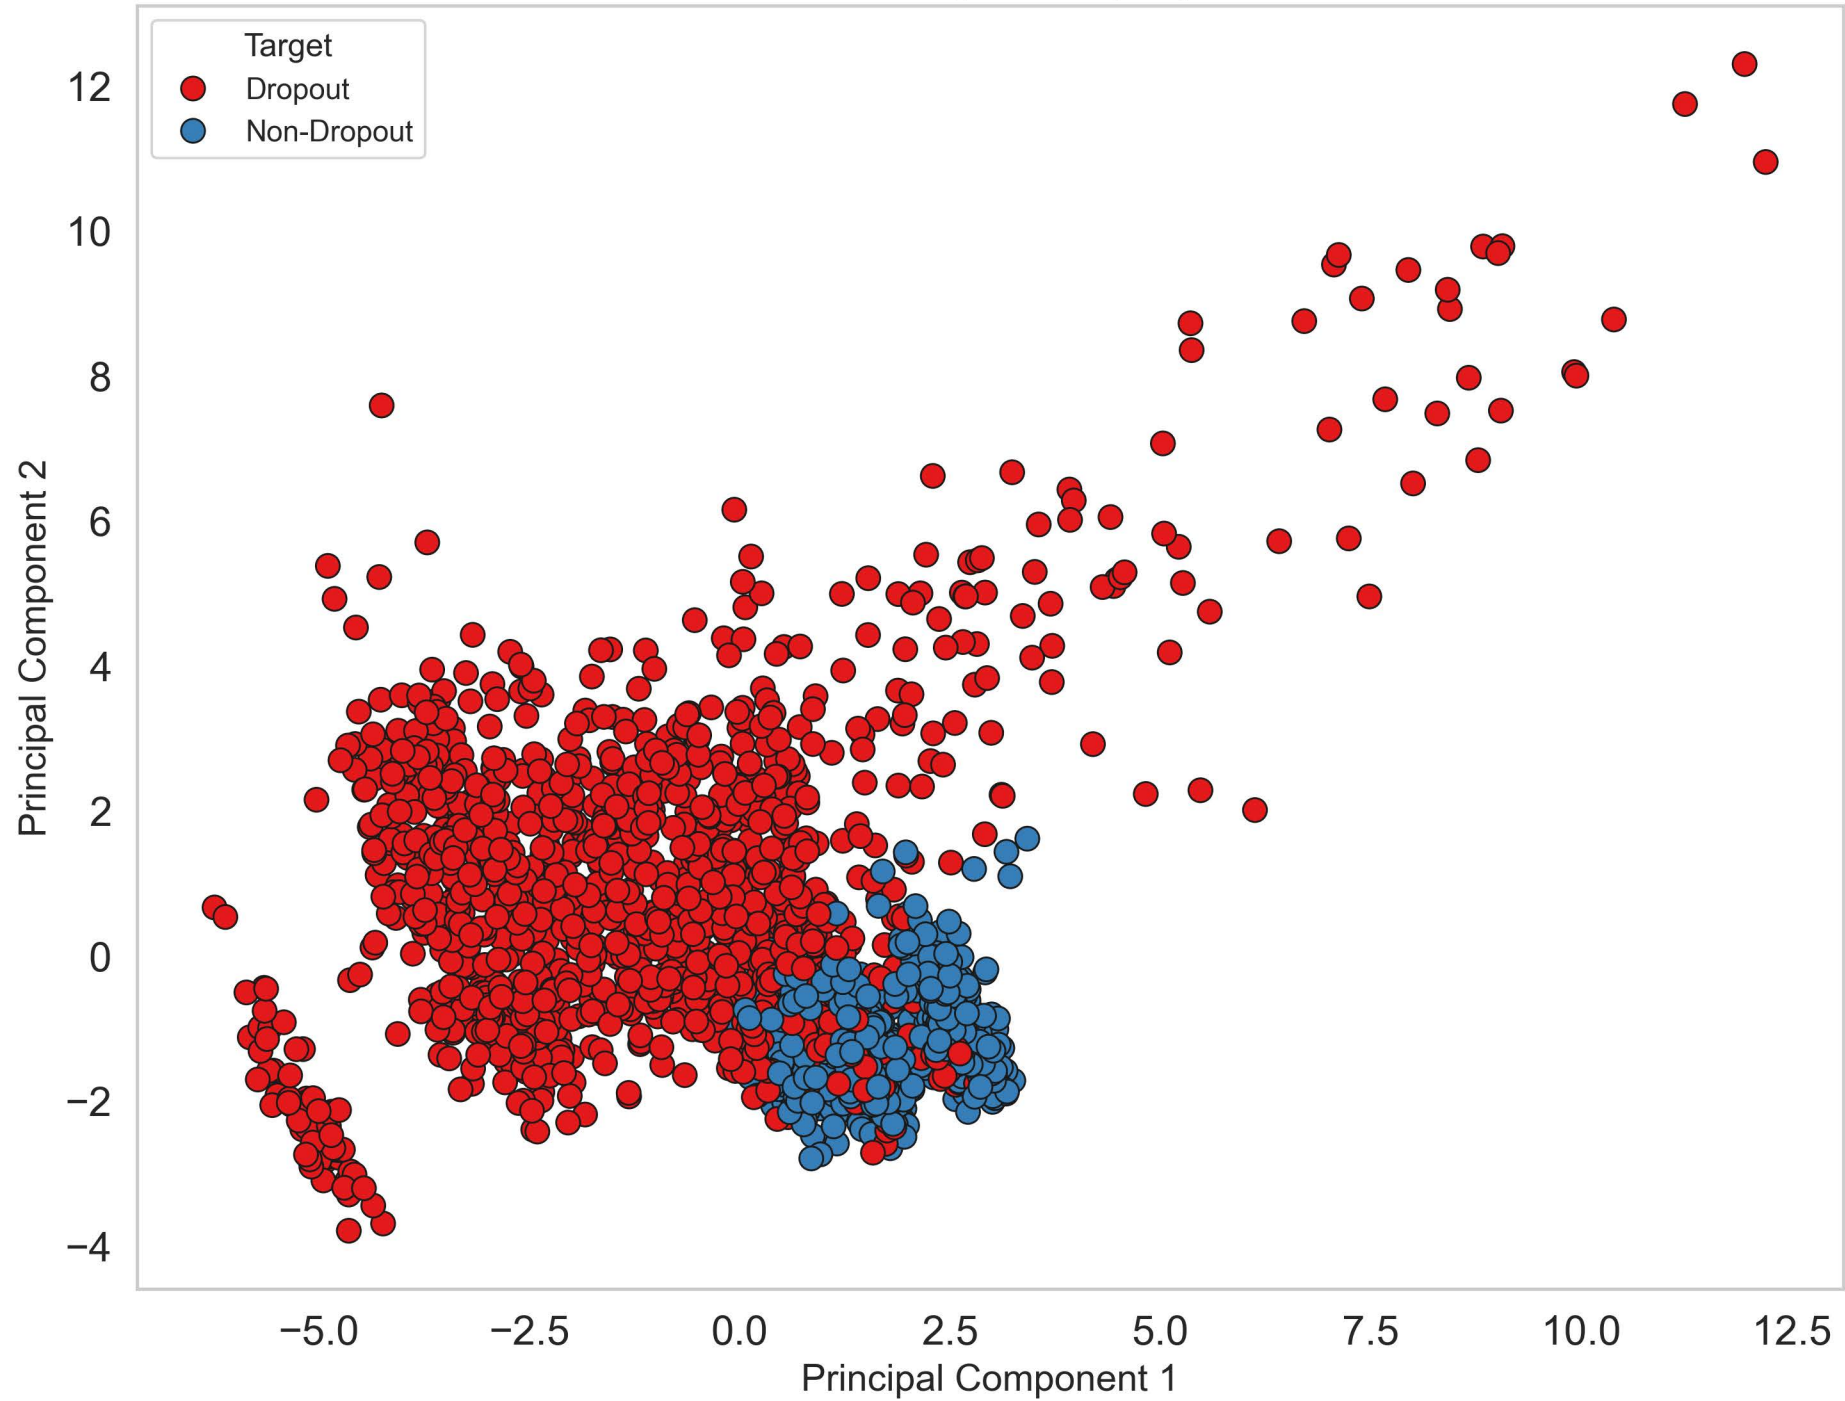

Supplement: Supplementary file 1 [file 2d_PCA_after22.pdf › figures/2d_PCA_after22.pdf]

PCA Projection (2D)

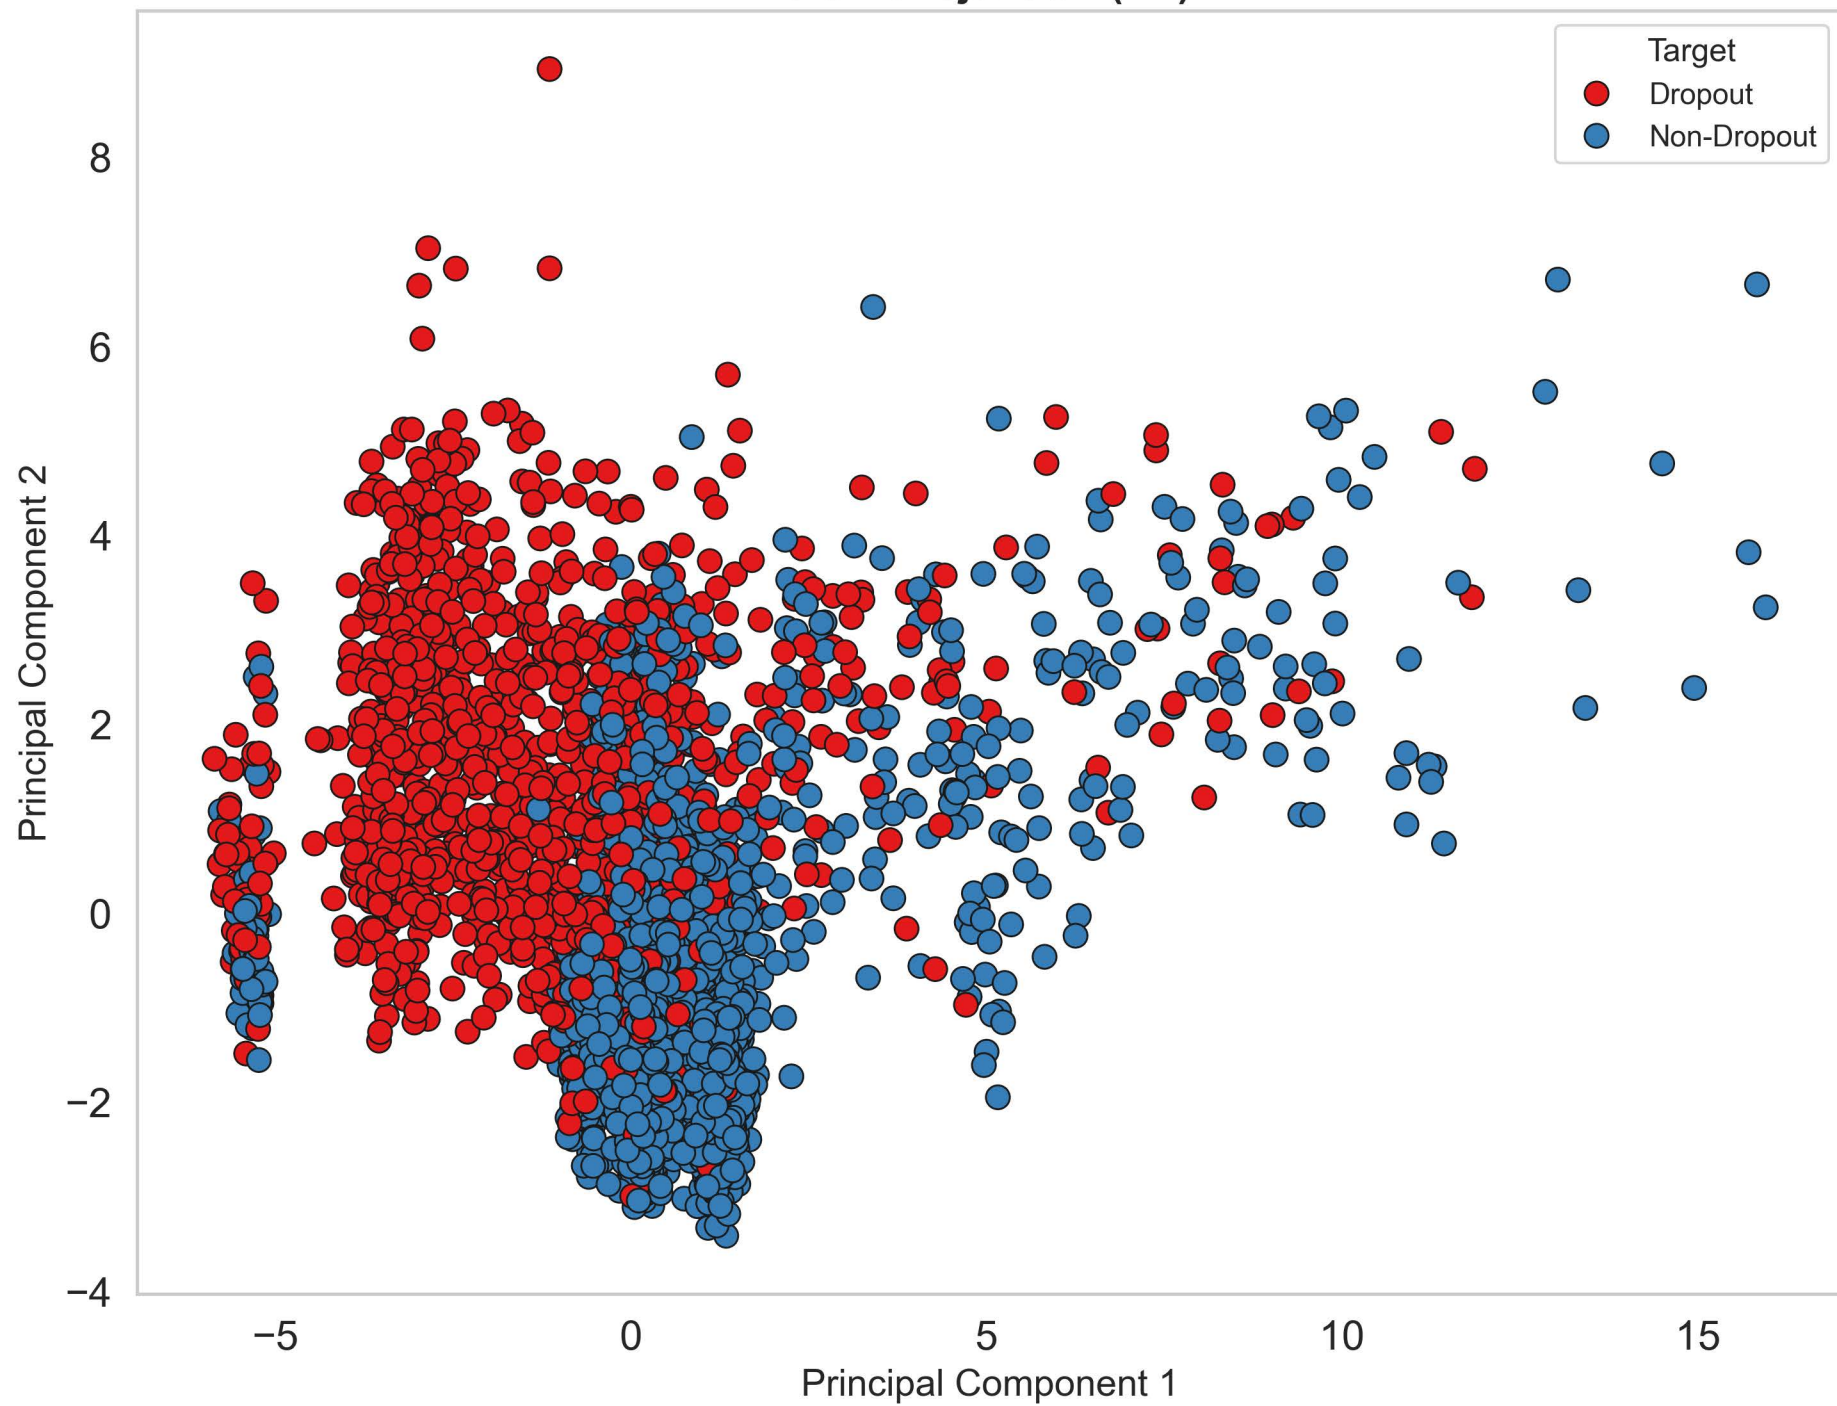

Supplement: Supplementary file 2 [file 2d_PCA_before.pdf › figures/2d_PCA_before.pdf]

**LR**

True Labels

Non\_Dropout  
Dropout

**454**

**13**

**28**

**367**

Non\_Dropout

Dropout

Predicted Labels

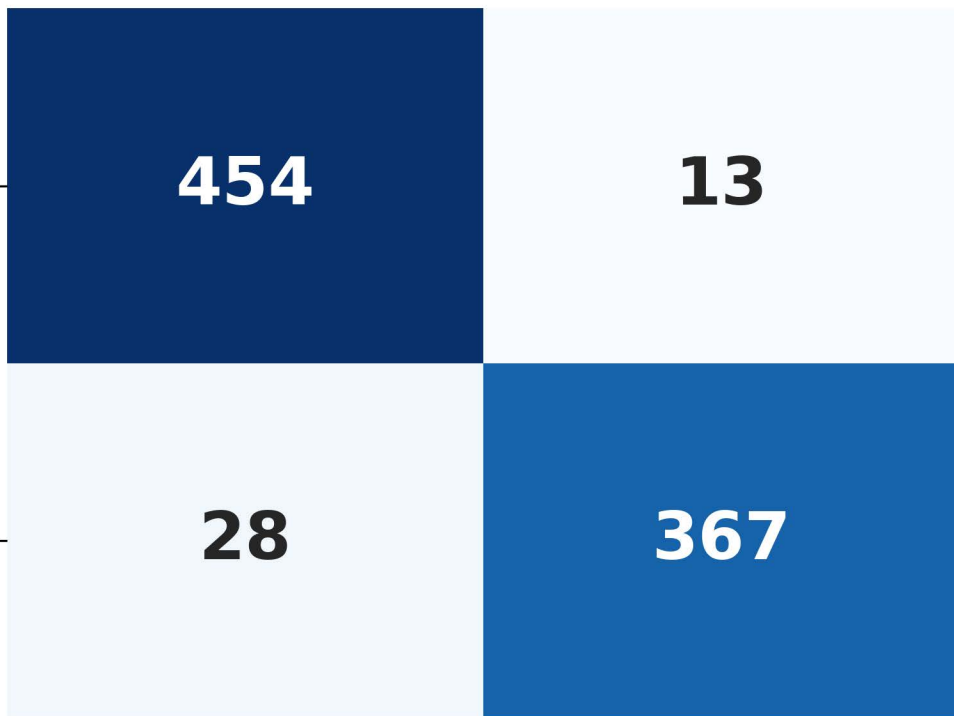

Supplement: Supplementary file 3 [file CM_ LR.pdf › figures/CM_ LR.pdf]

**LR**

True Labels

Non\_Dropout  
Dropout

**53**

**1**

**4**

**38**

Non\_Dropout

Dropout

Predicted Labels

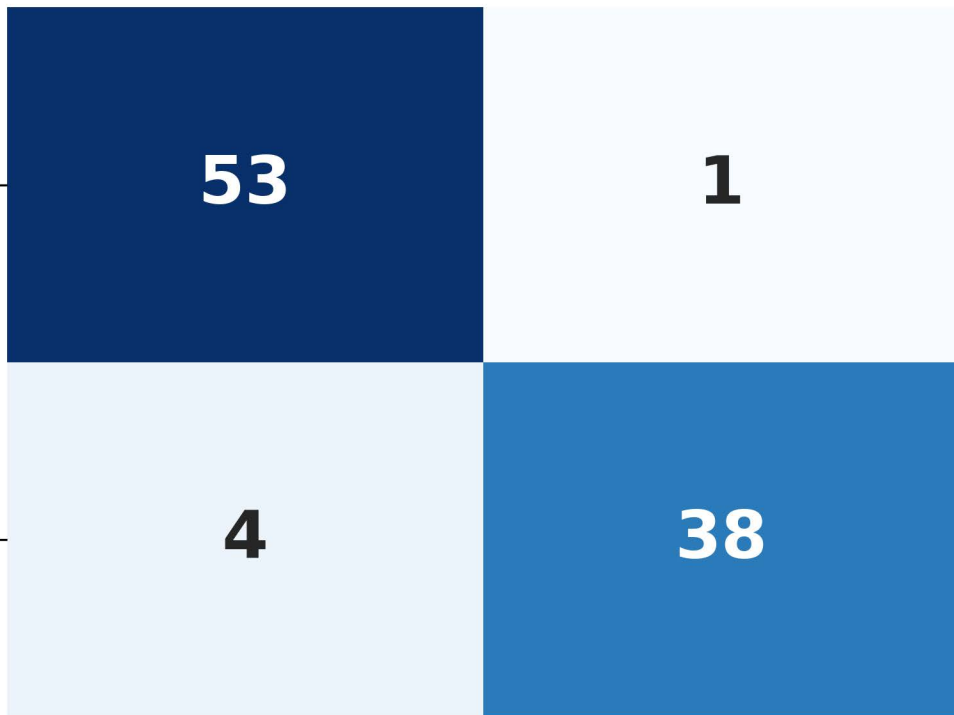

Supplement: Supplementary file 4 [file CM_ LR2.pdf › figures/CM_ LR2.pdf]

**RF**

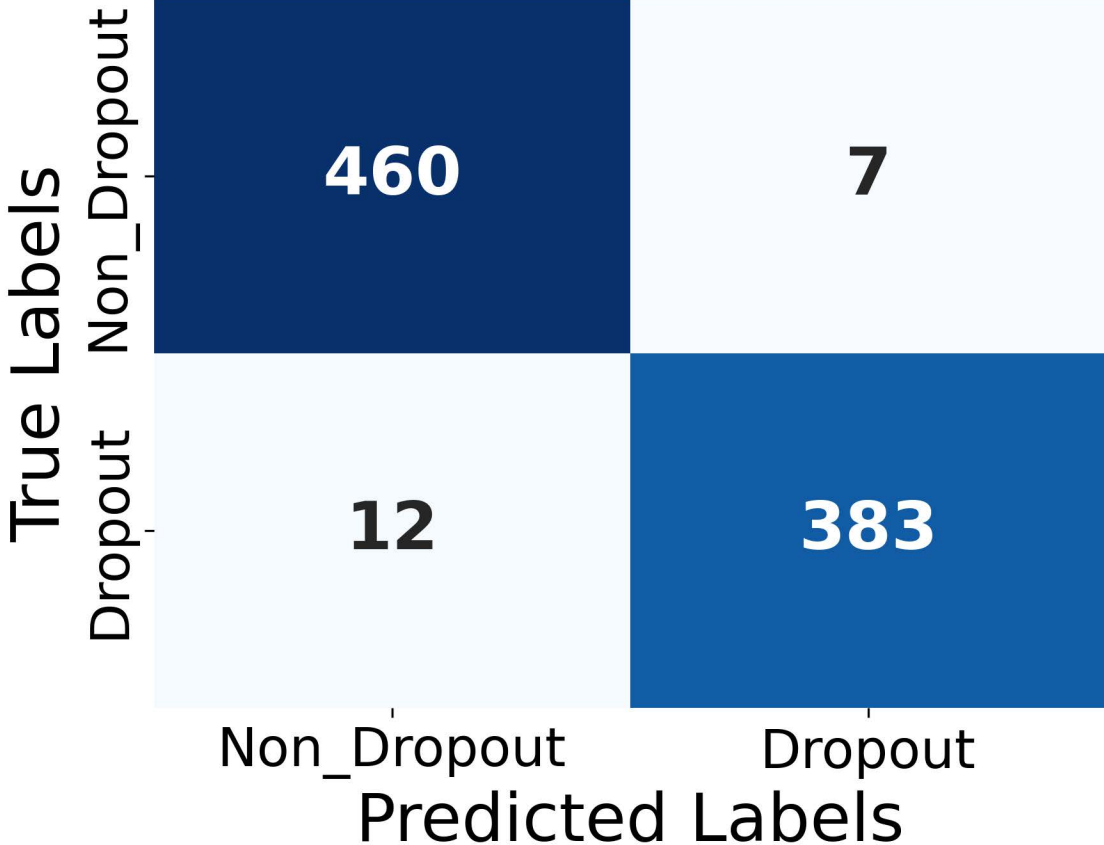

Supplement: Supplementary file 5 [file CM_ RF.pdf › figures/CM_ RF.pdf]

**RF**

True Labels

Non\_Dropout  
Dropout

**54**

**0**

**0**

**42**

Non\_Dropout

Dropout

Predicted Labels

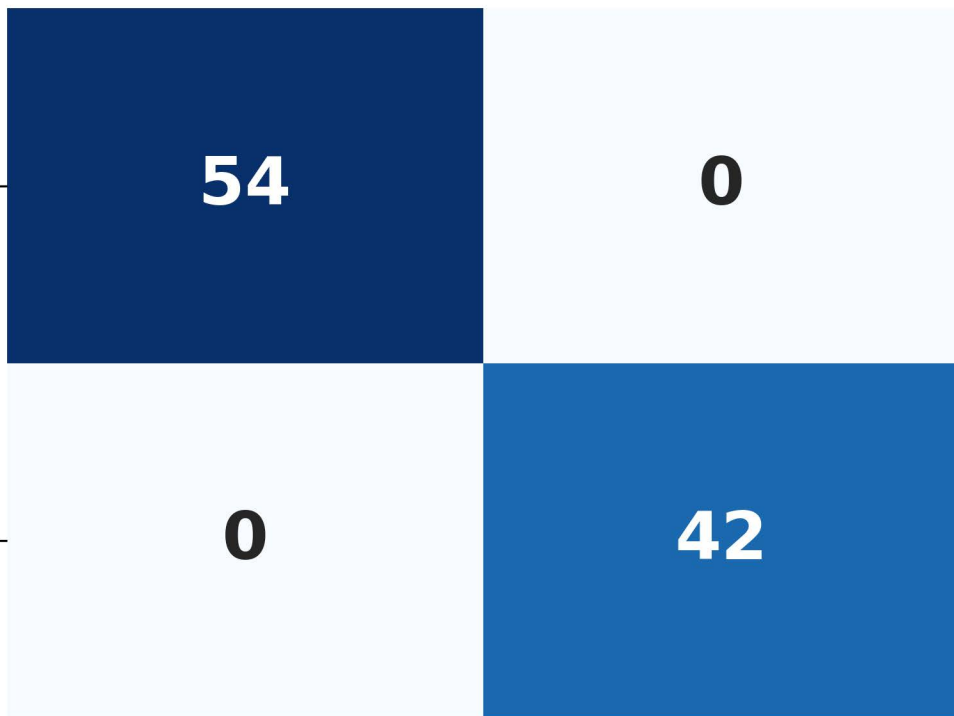

Supplement: Supplementary file 6 [file CM_ RF2.pdf › figures/CM_ RF2.pdf]

# MLP

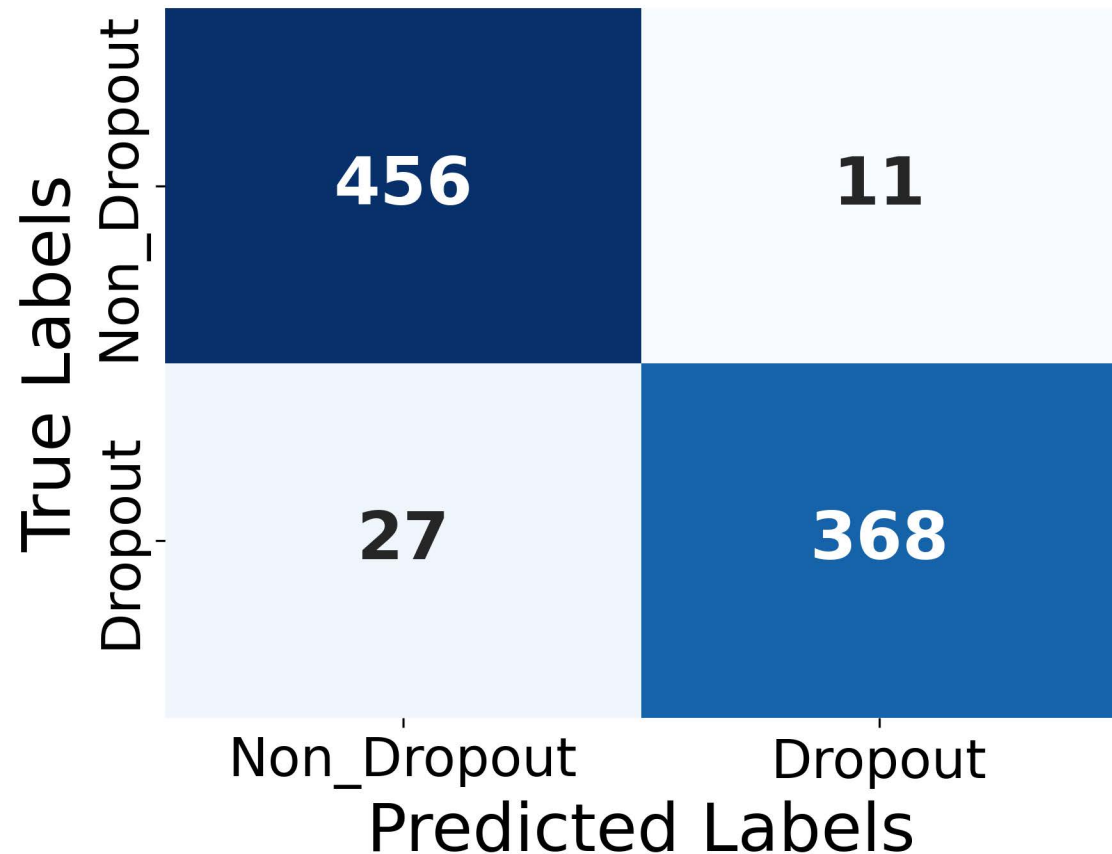

Supplement: Supplementary file 7 [file CM_MLP.pdf › figures/CM_MLP.pdf]

# MLP

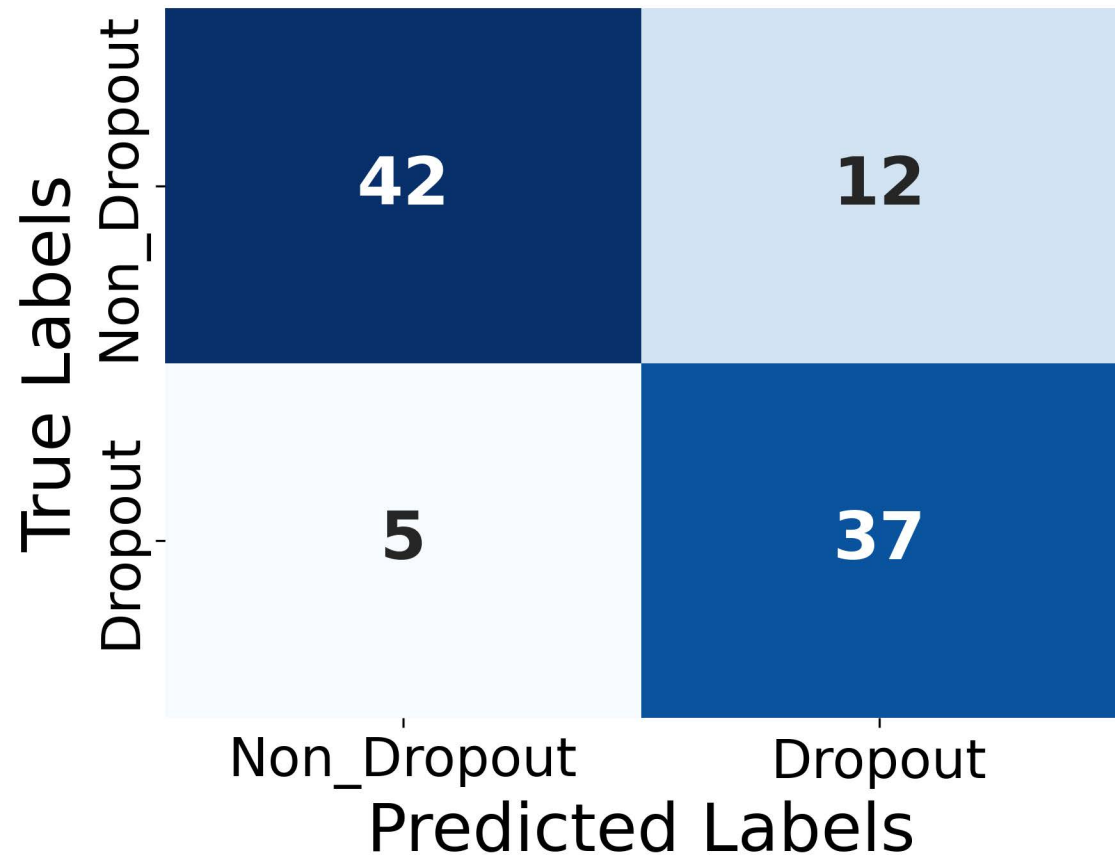

Supplement: Supplementary file 8 [file CM_MLP2.pdf › figures/CM_MLP2.pdf]

# SVM

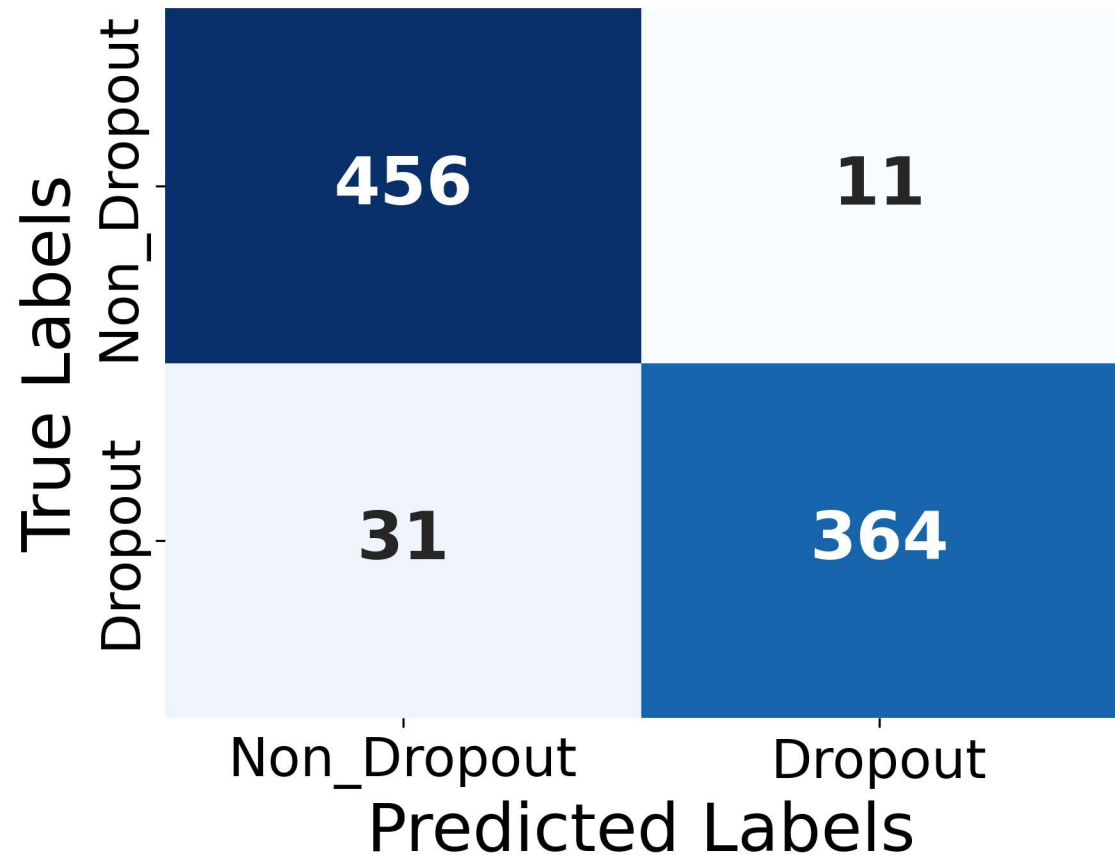

Supplement: Supplementary file 9 [file CM_SVM.pdf › figures/CM_SVM.pdf]

# SVM

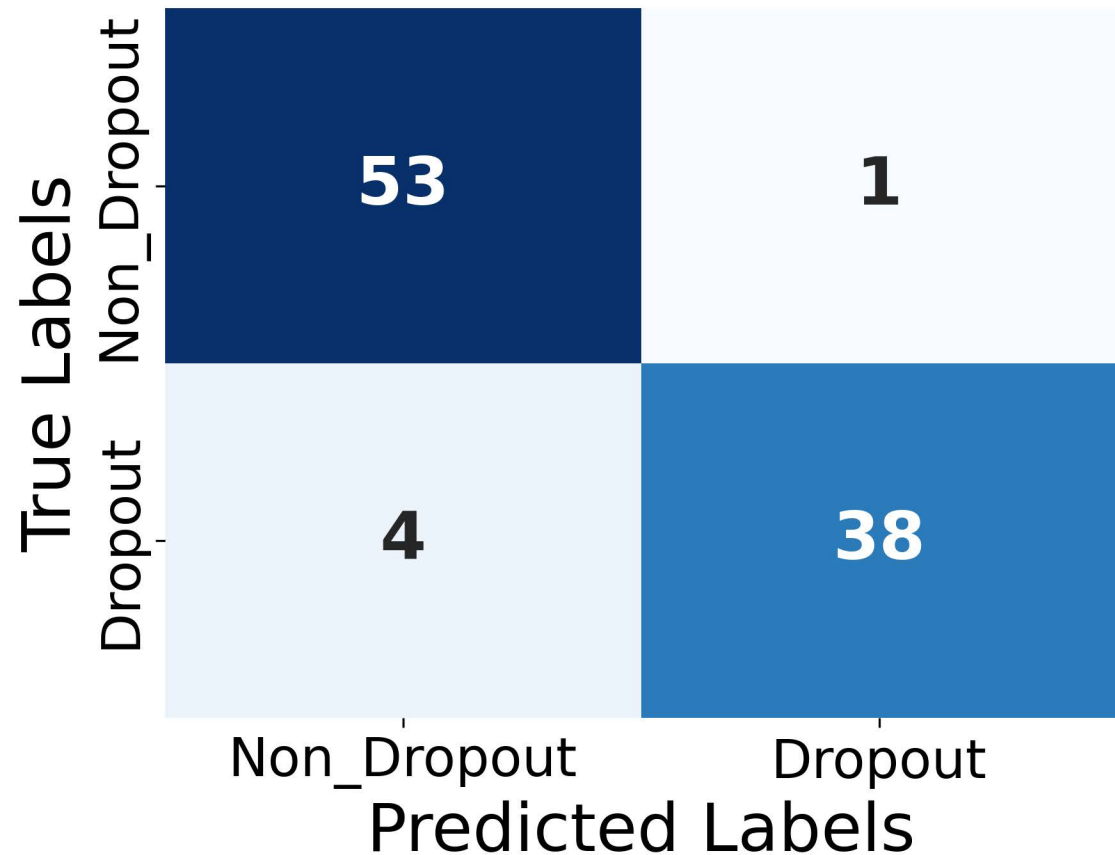

Supplement: Supplementary file 10 [file CM_SVM2.pdf › figures/CM_SVM2.pdf]

# XGB

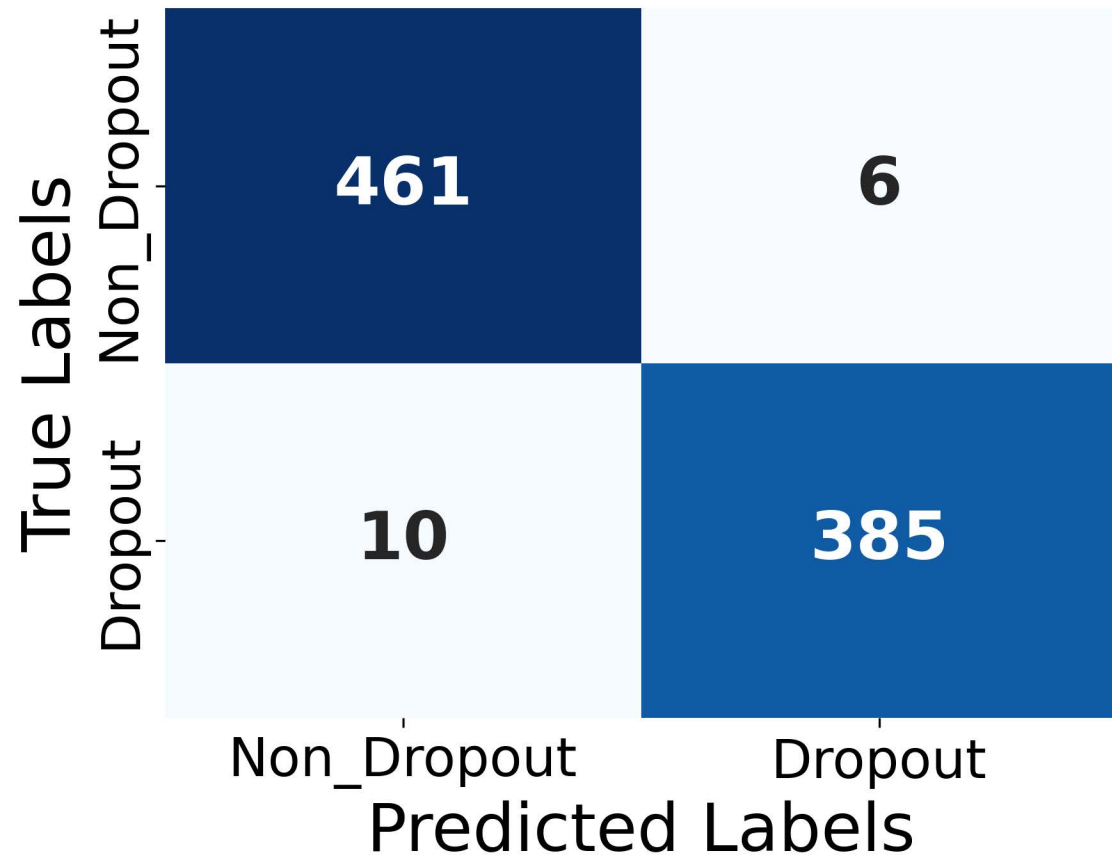

Supplement: Supplementary file 11 [file CM_XGB.pdf › figures/CM_XGB.pdf]

# XGB

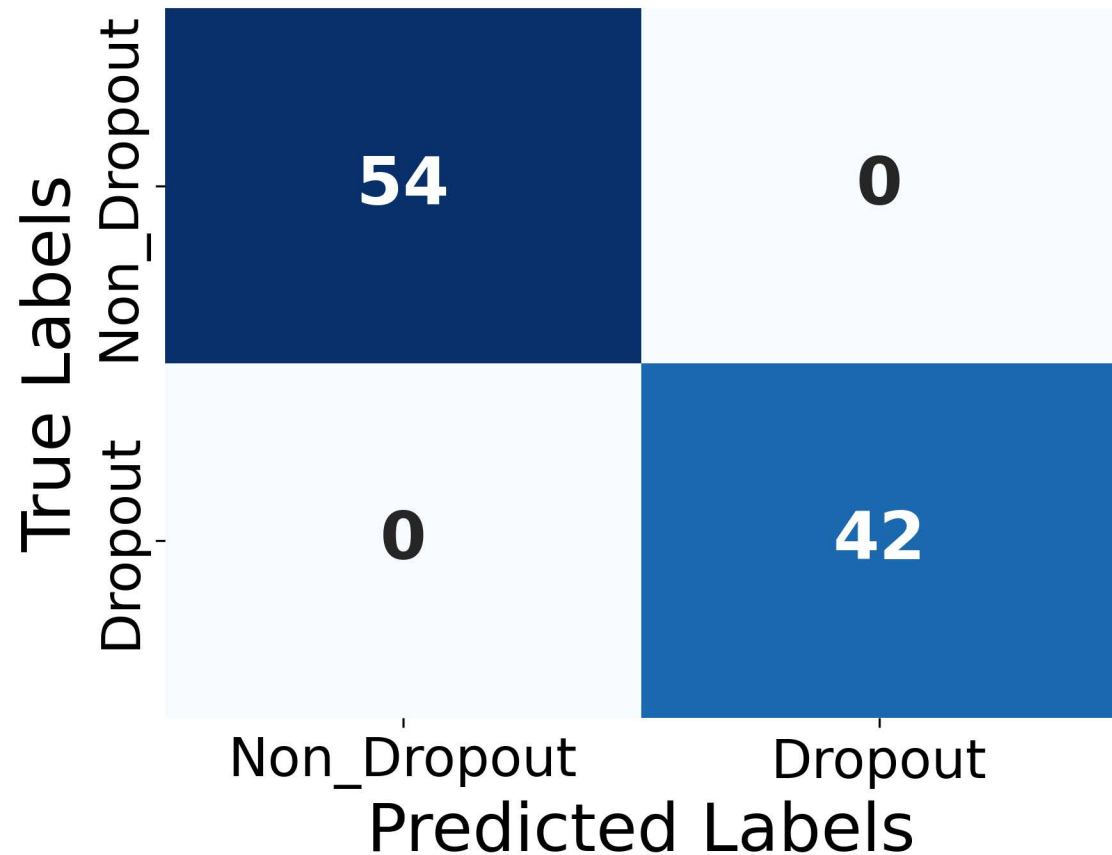

Supplement: Supplementary file 12 [file CM_XGB2.pdf › figures/CM_XGB2.pdf]

Correlation Heatmap

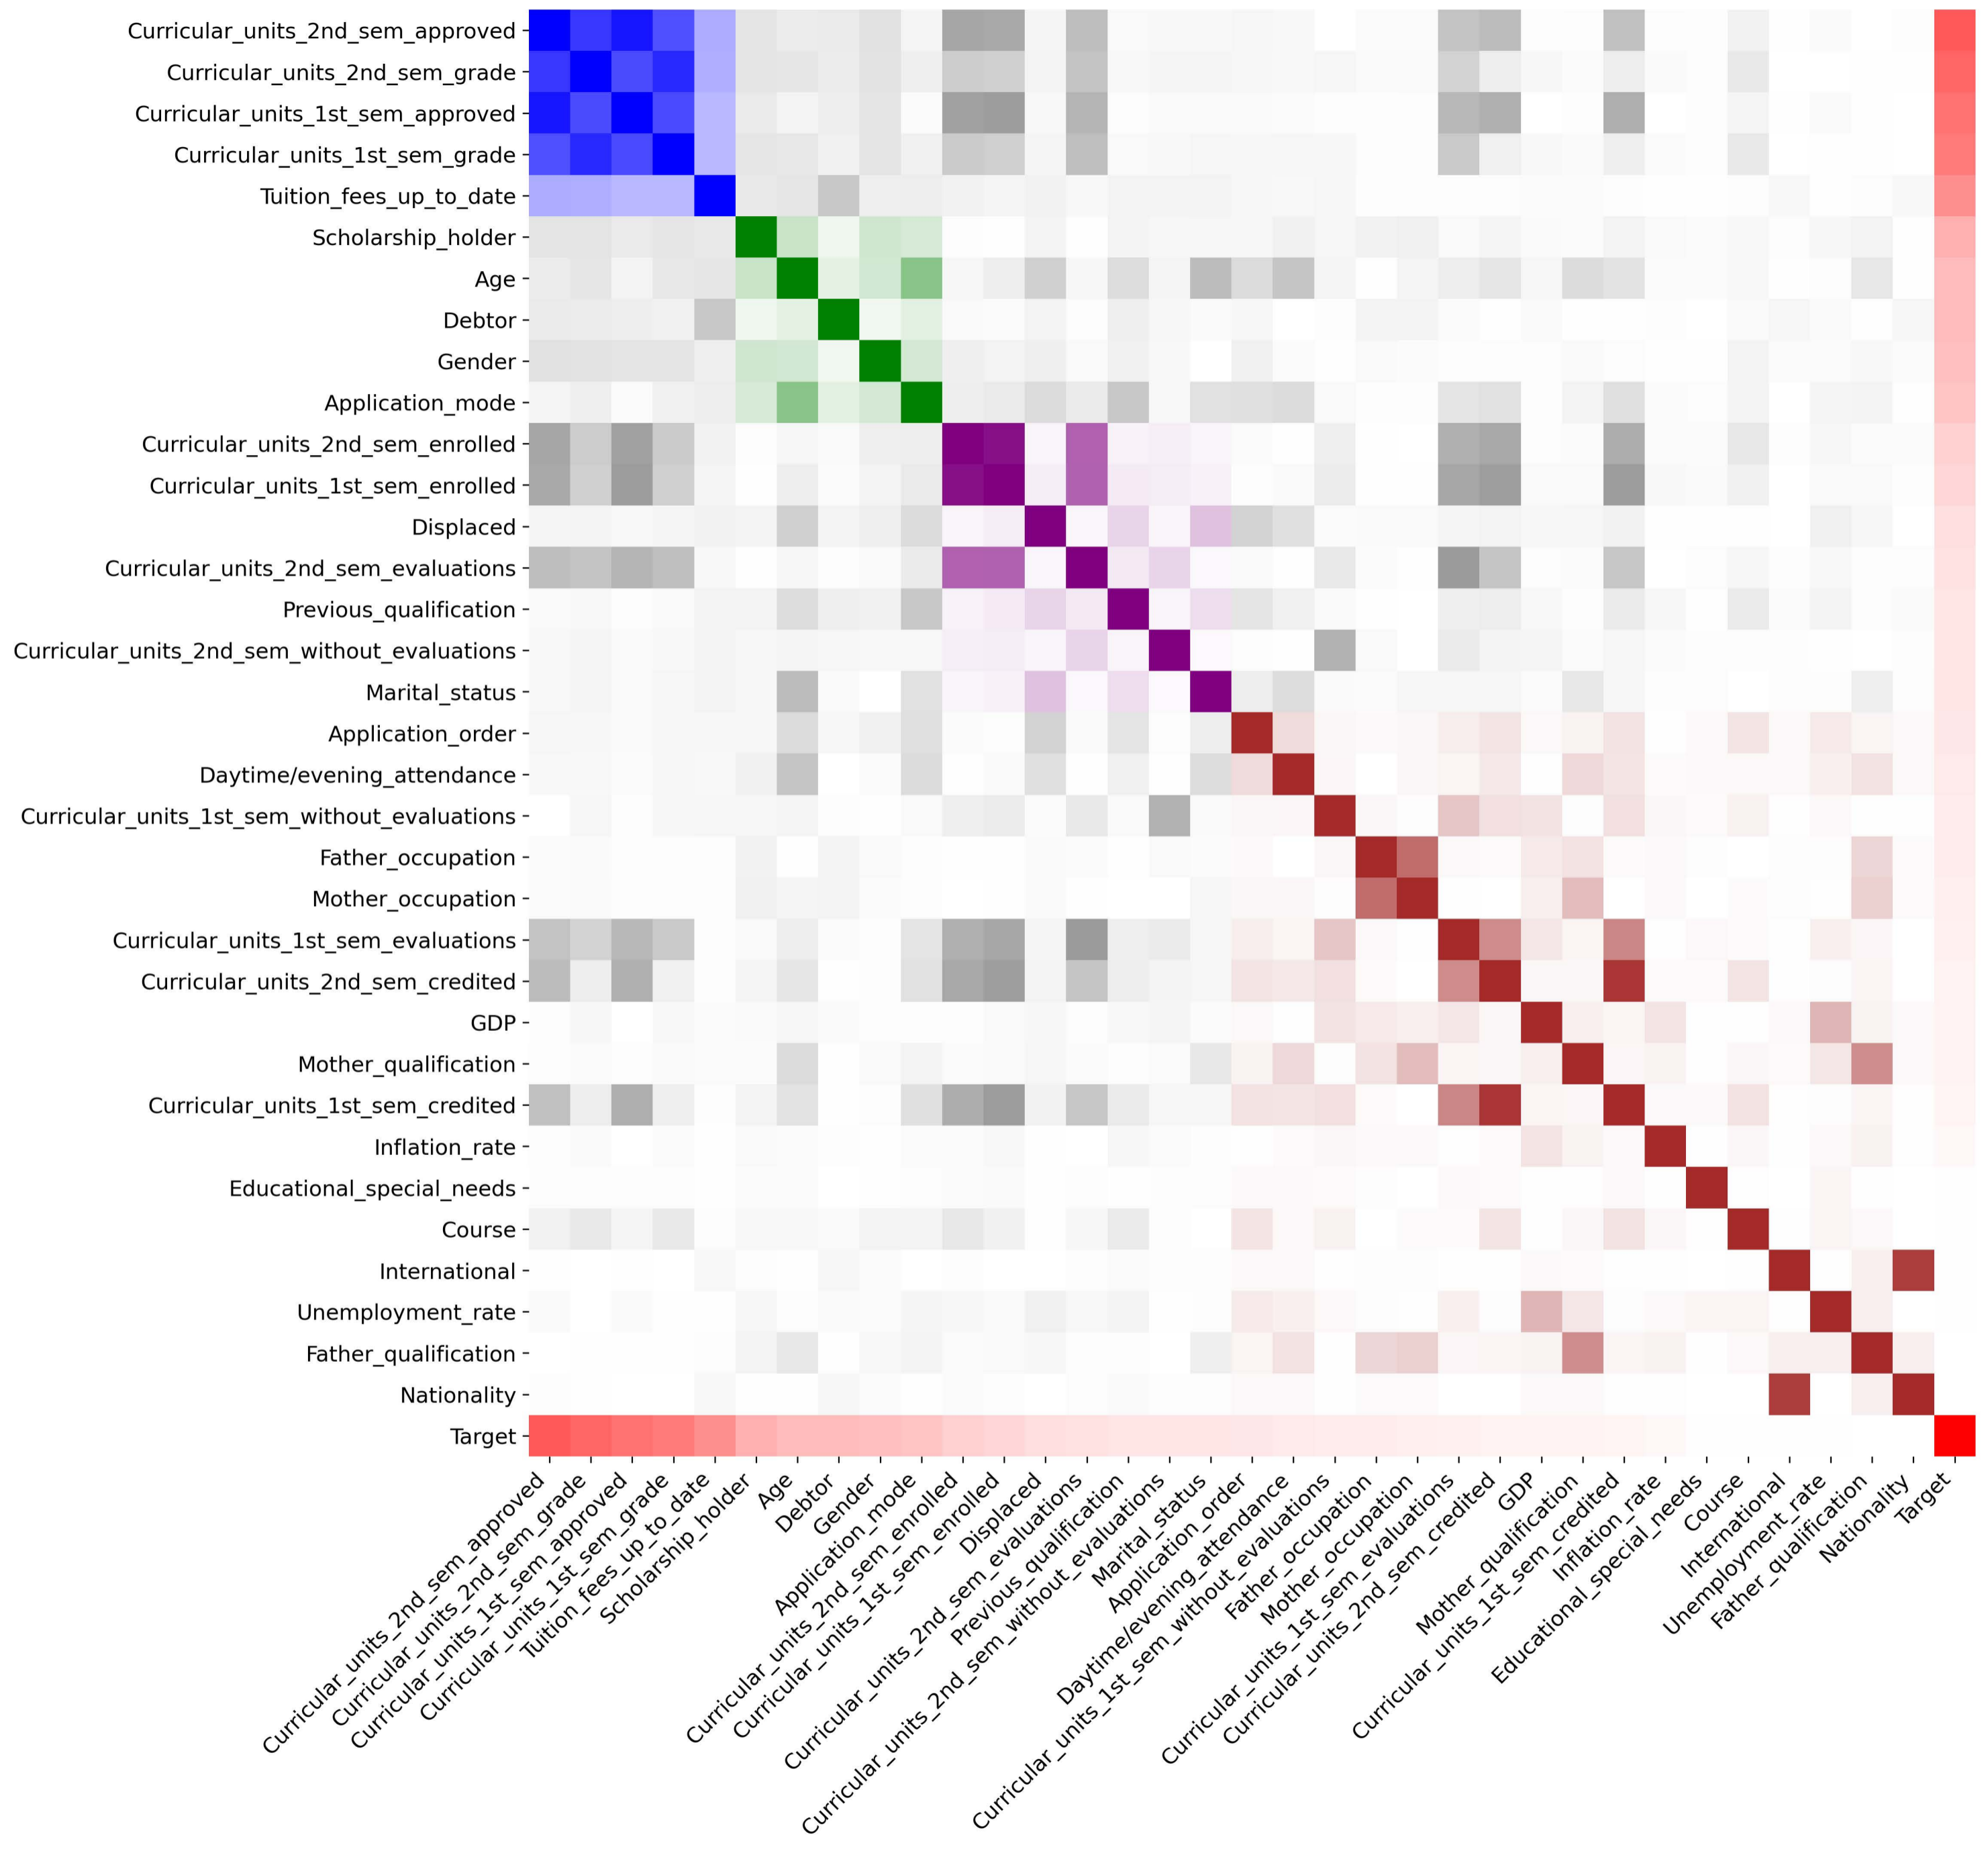

Supplement: Supplementary file 13 [file Correlation_Heatmap.pdf › figures/Correlation_Heatmap.pdf]

Features

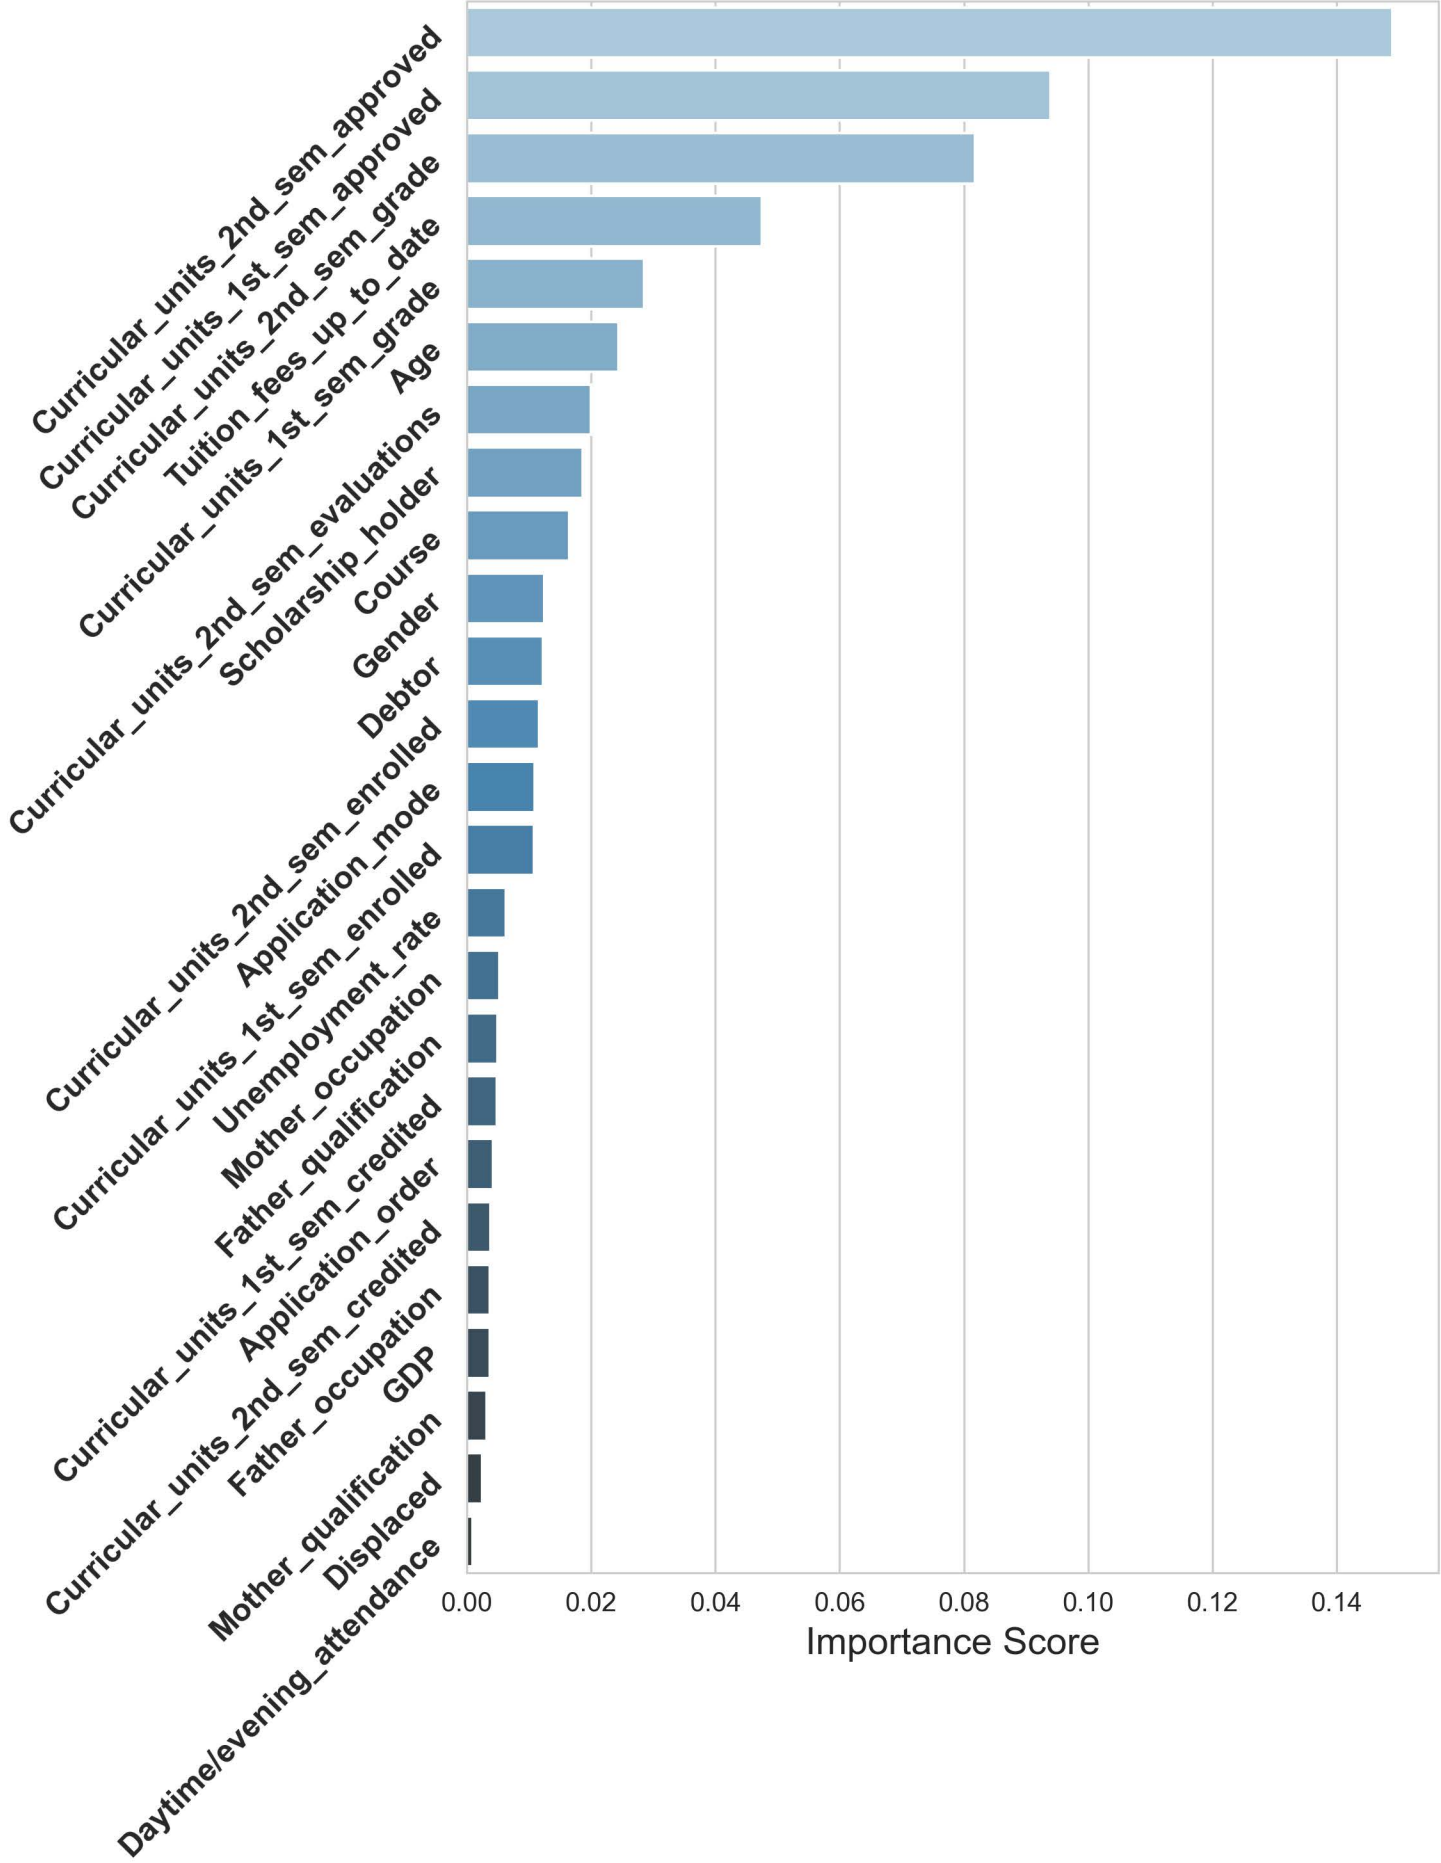

Importance Score

Supplement: Supplementary file 14 [file Output_RFI_after.pdf › figures/Output_RFI_after.pdf]

Features

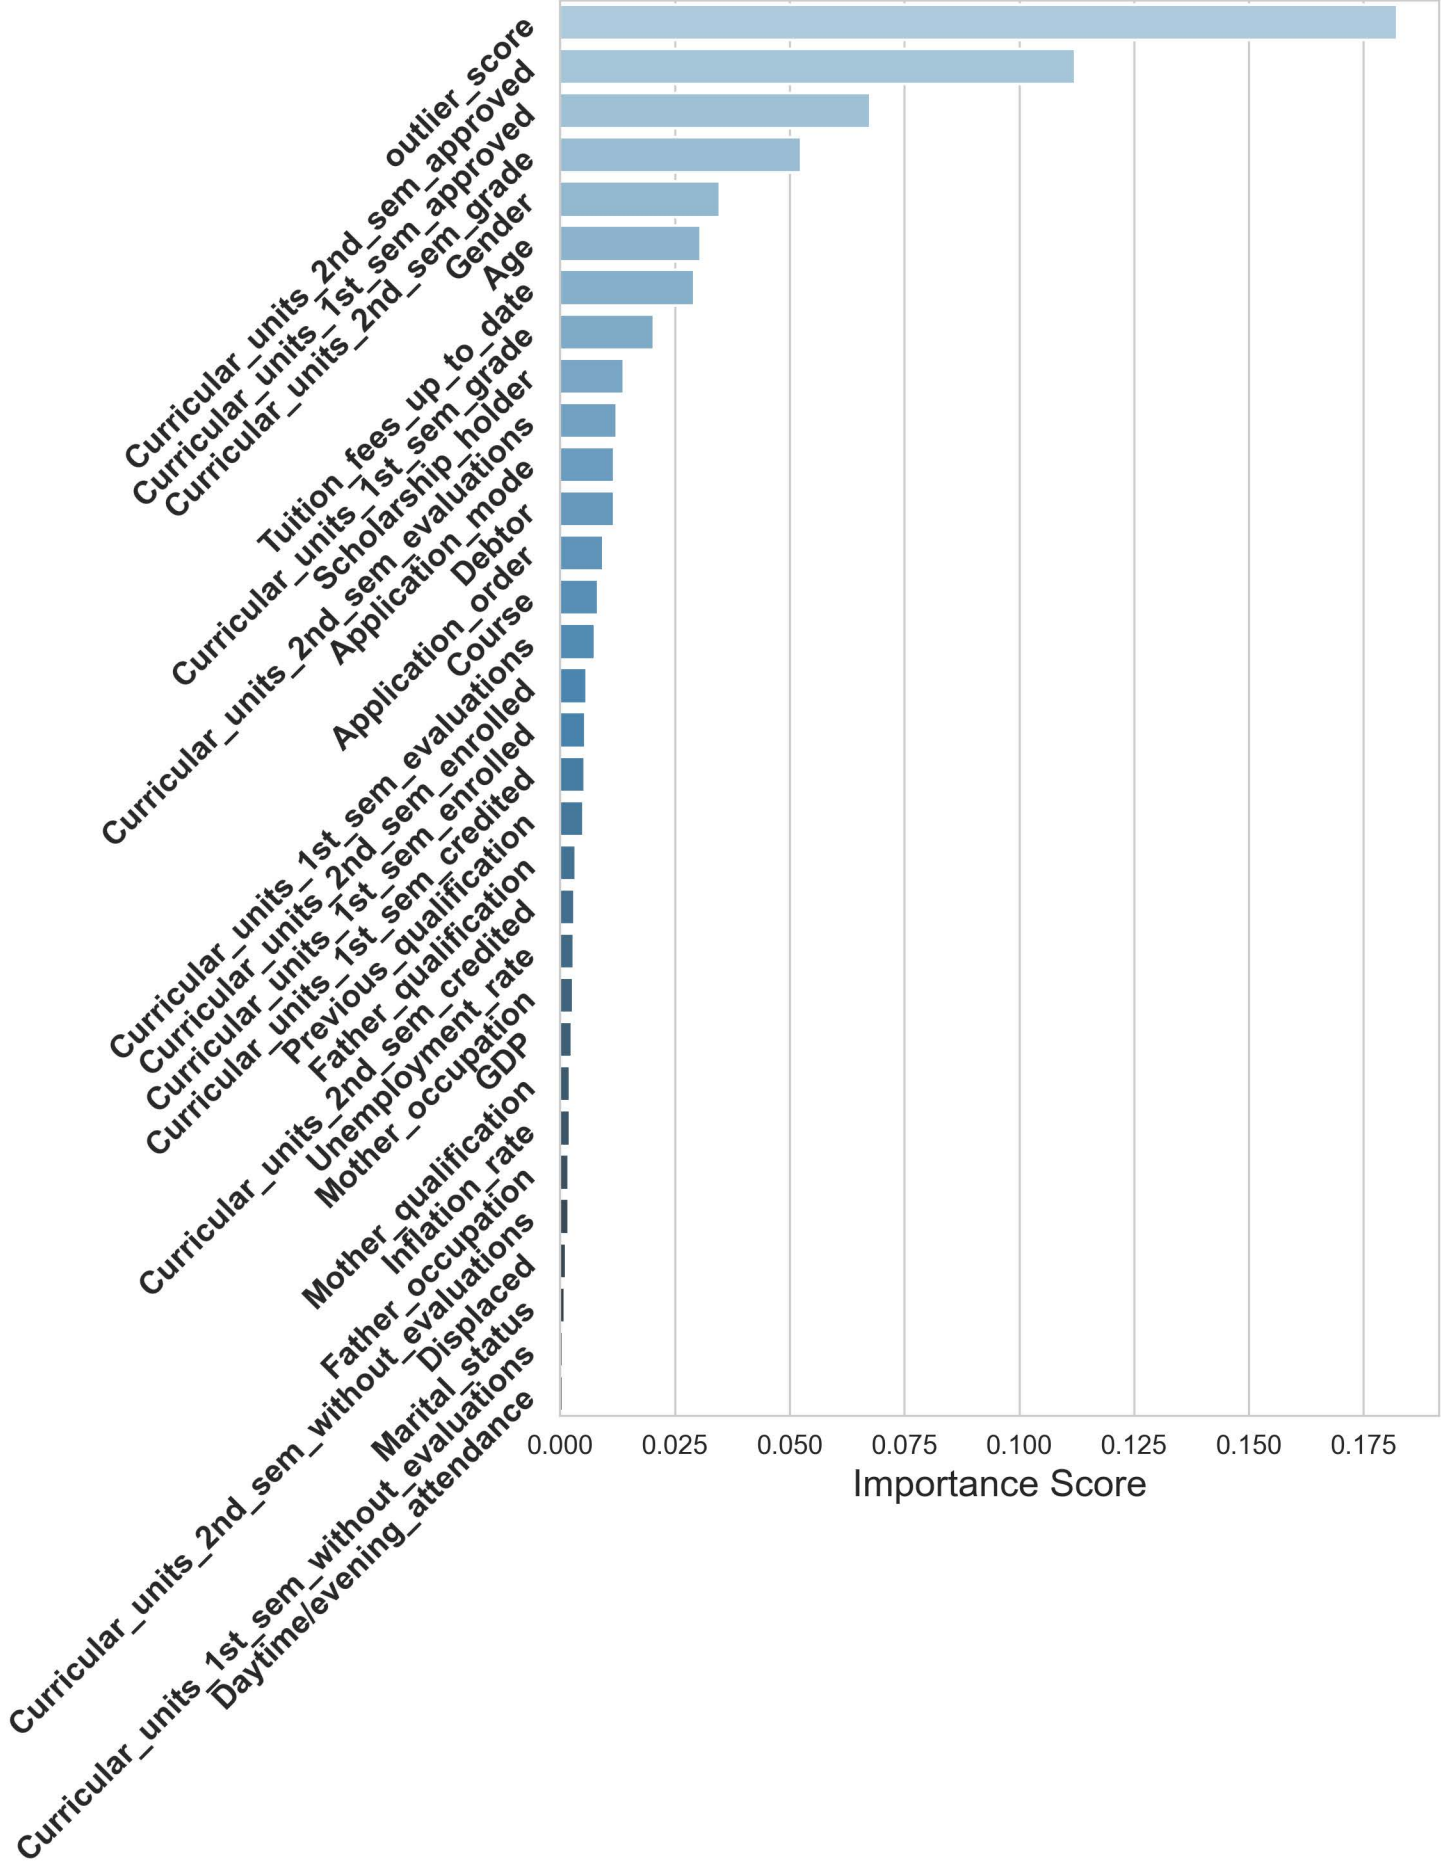

Supplement: Supplementary file 15 [file Output_RFI_before.pdf › figures/Output_RFI_before.pdf]

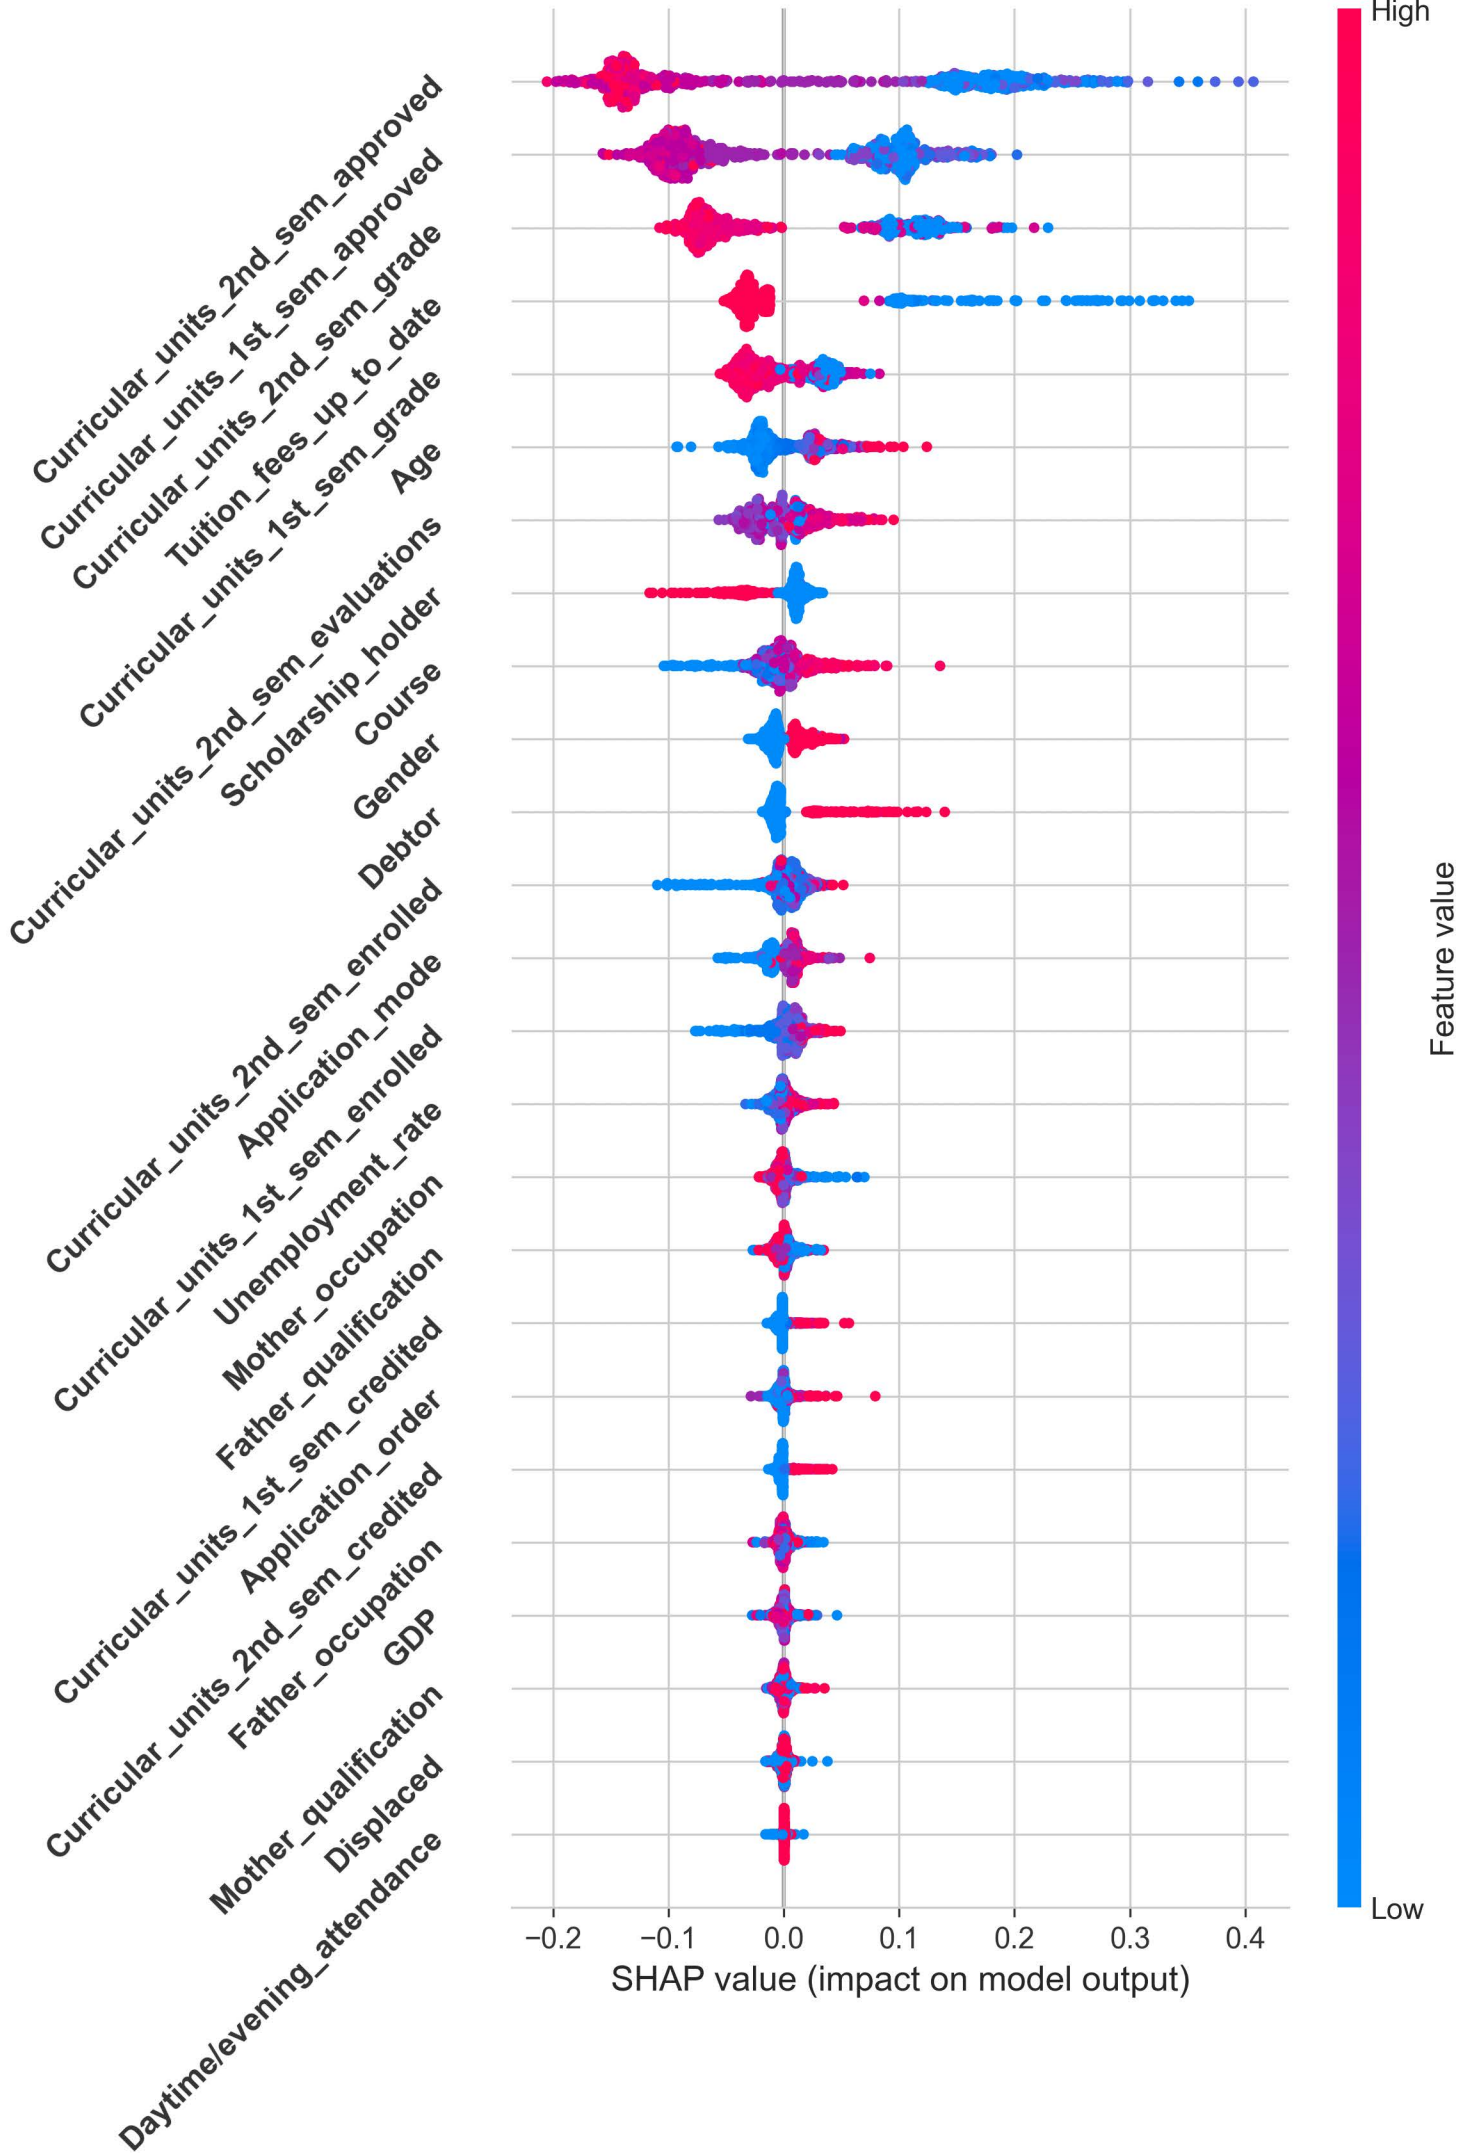

Supplement: Supplementary file 16 [file Output_shap_after.pdf › figures/Output_shap_after.pdf]

# Comparison of ROC Curves

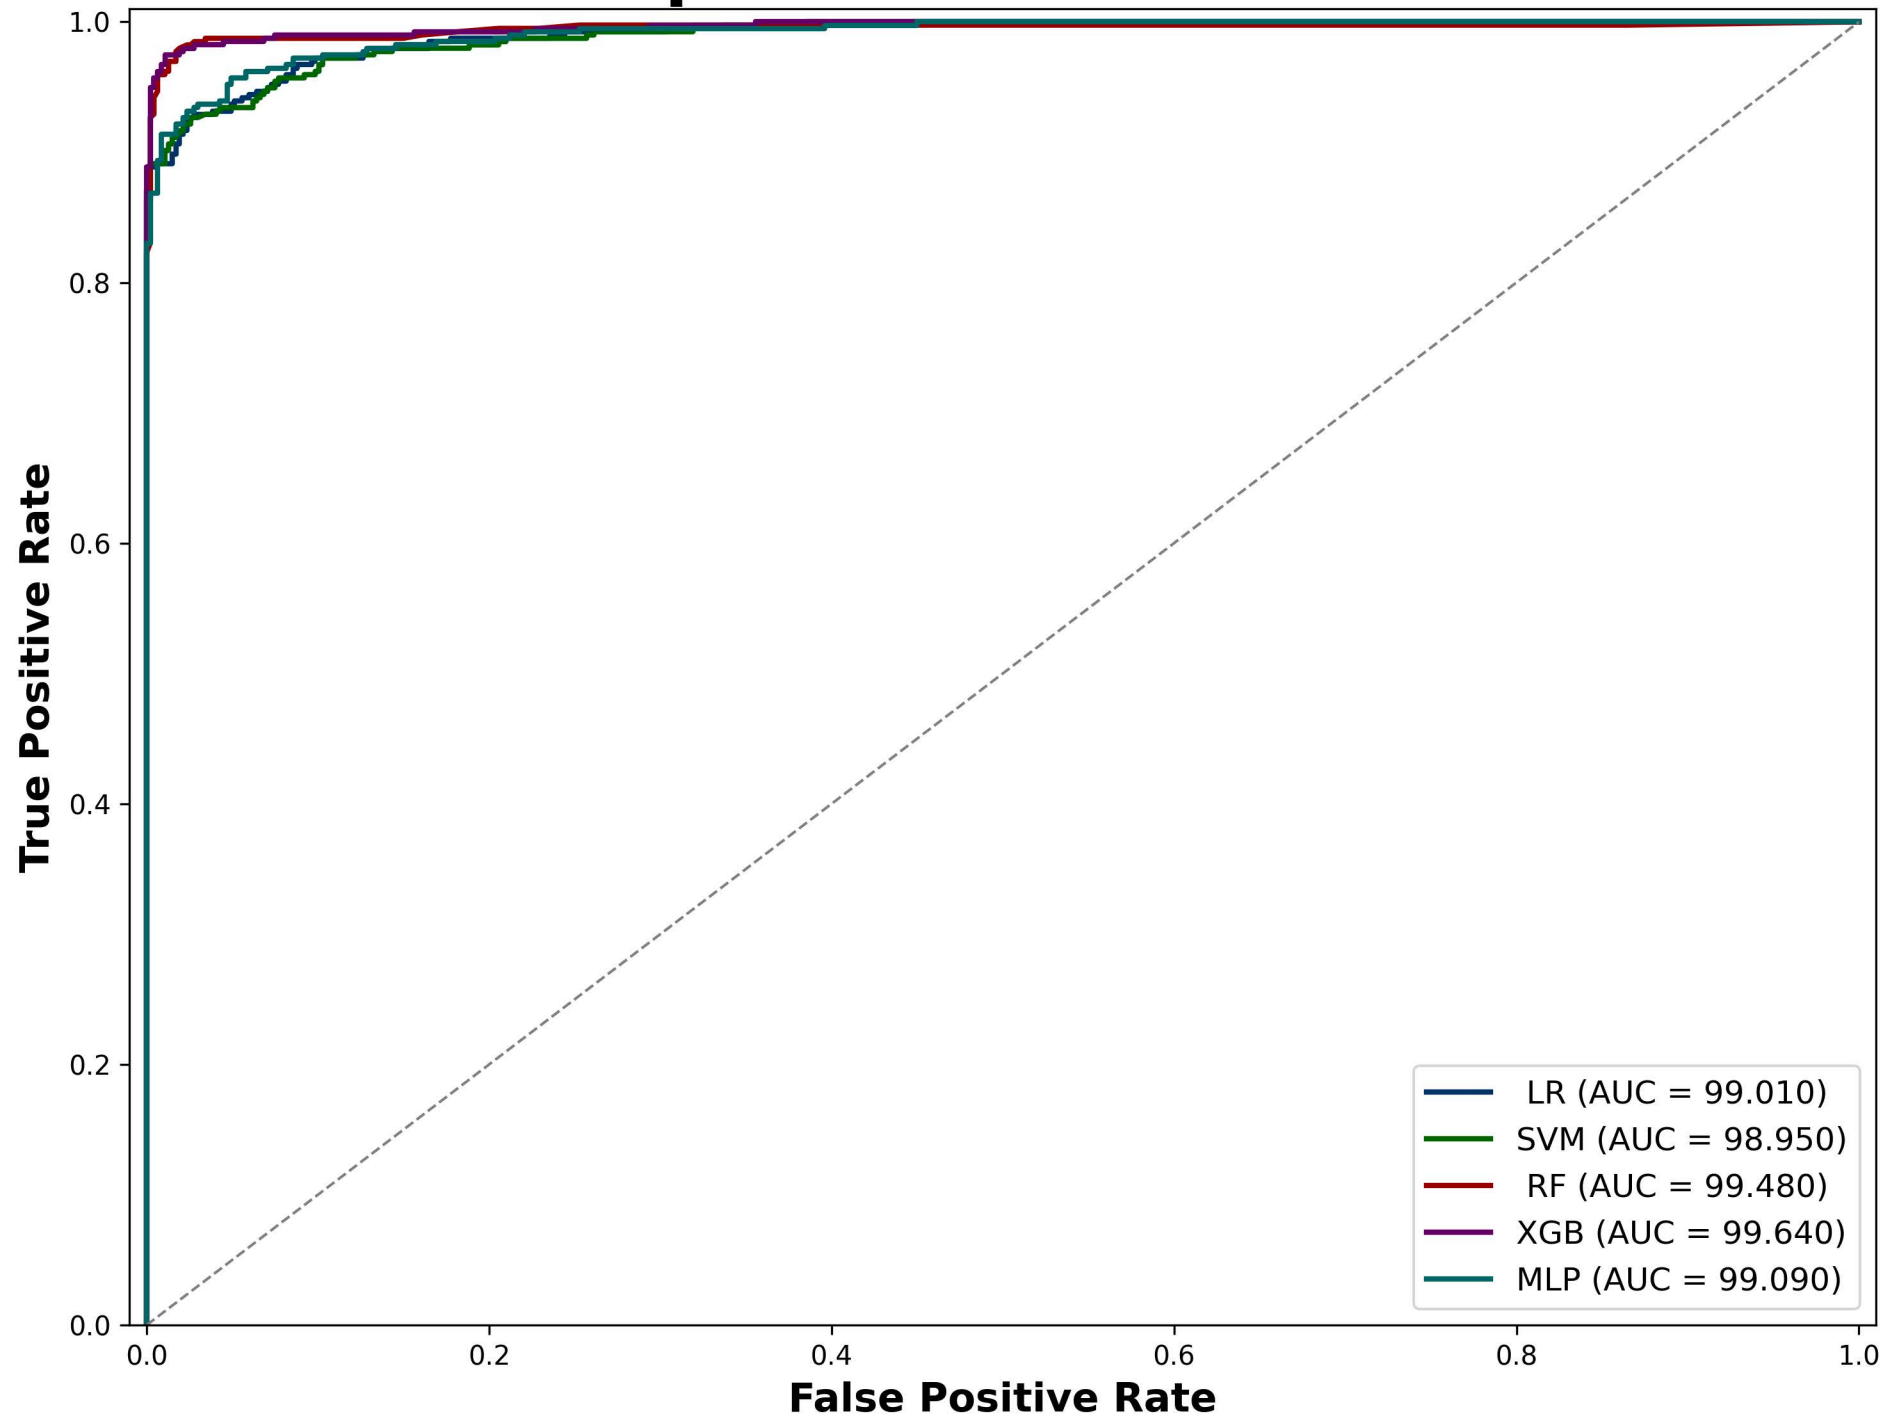

Supplement: Supplementary file 17 [file ROC.pdf › figures/ROC.pdf]

# Comparison of ROC Curves

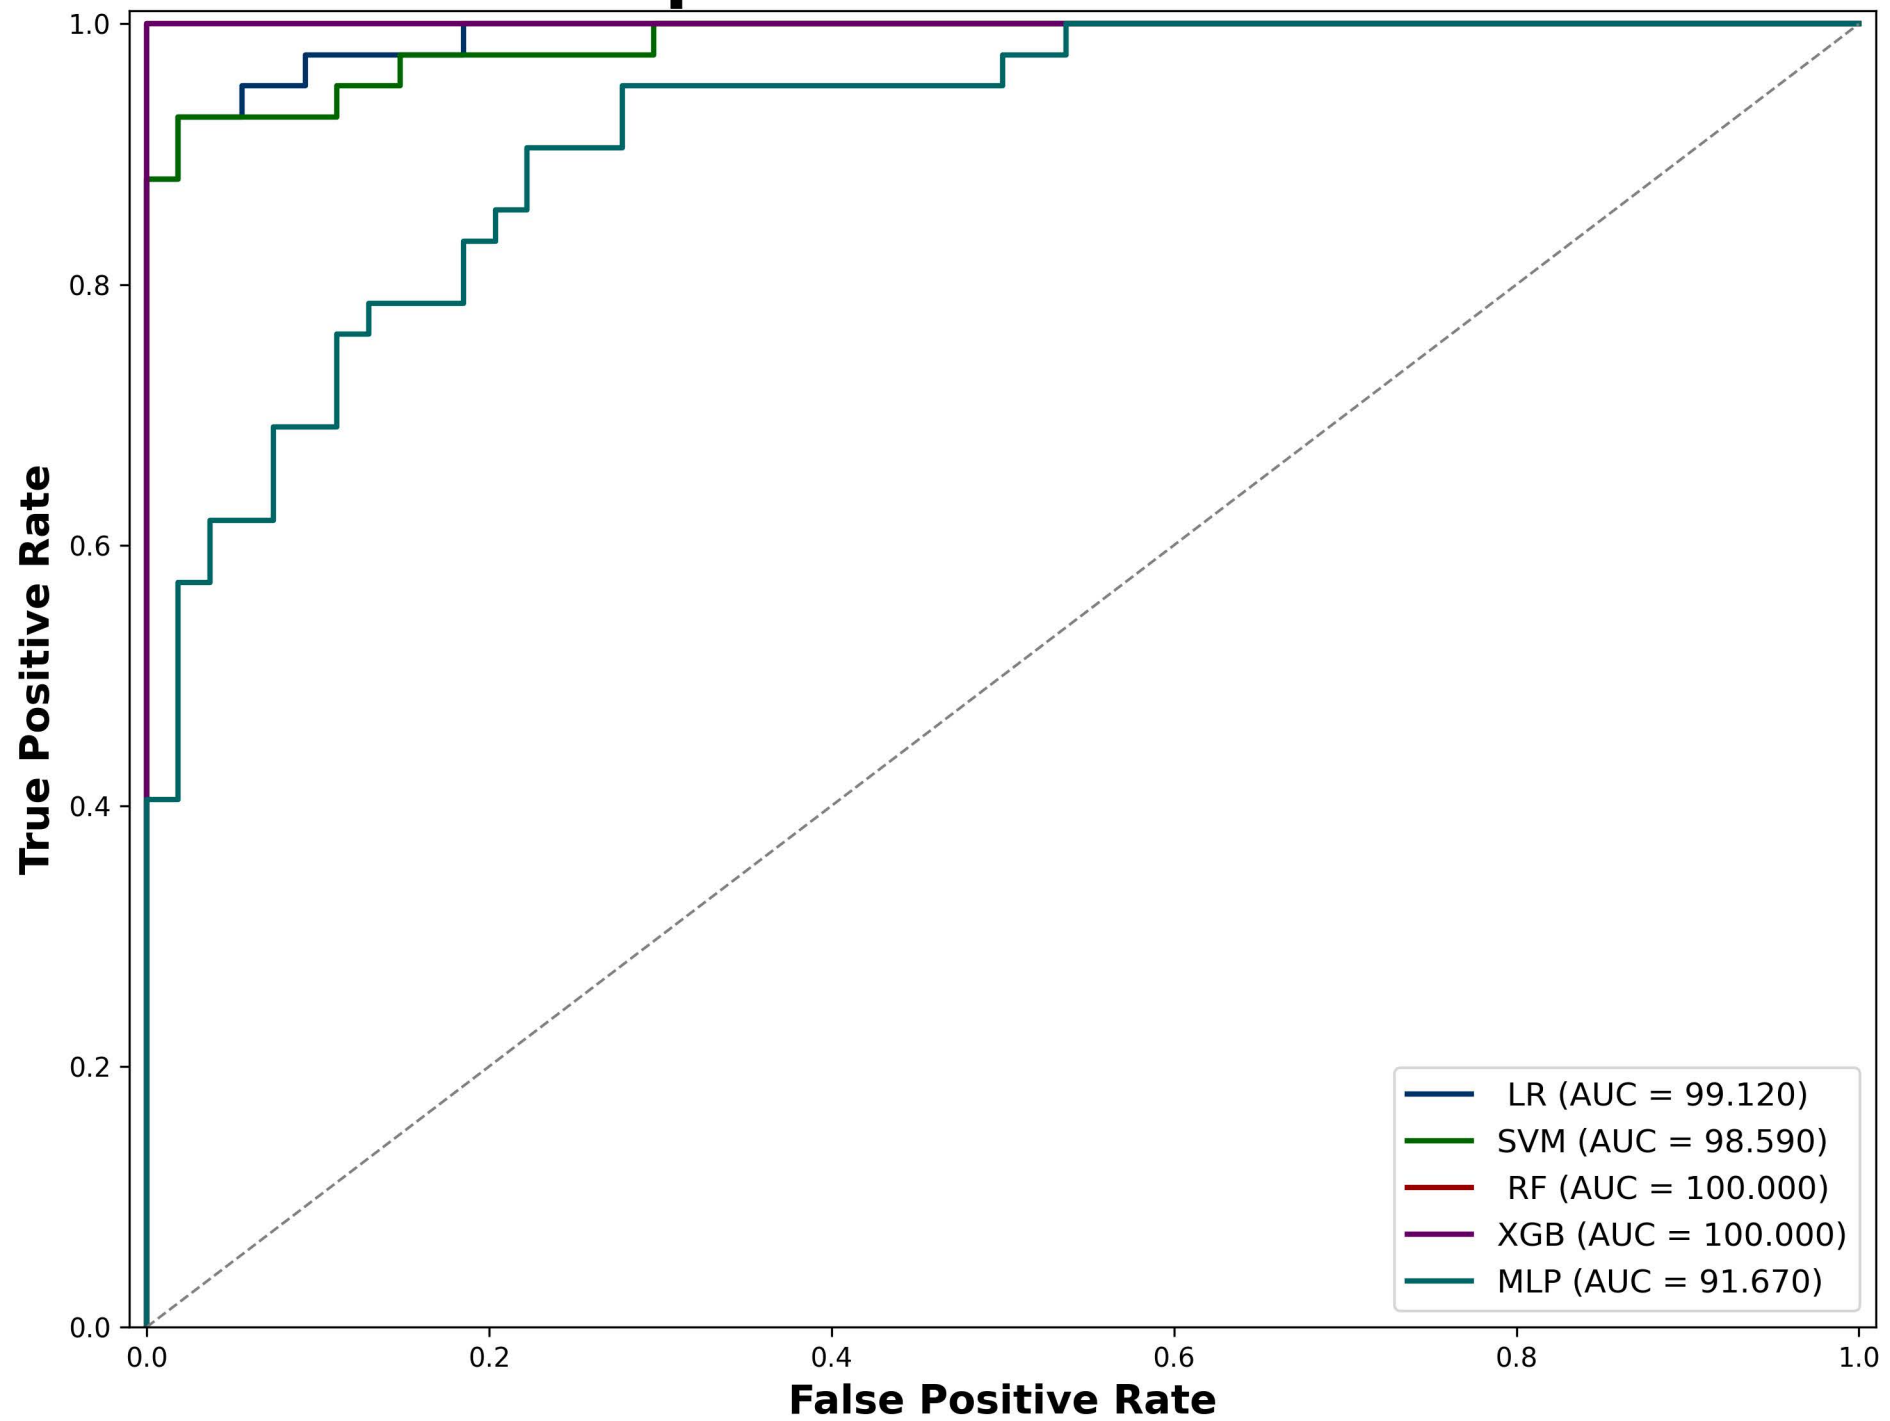

Supplement: Supplementary file 18 [file ROC2.pdf › figures/ROC2.pdf]

# Comparison of ROC Curves

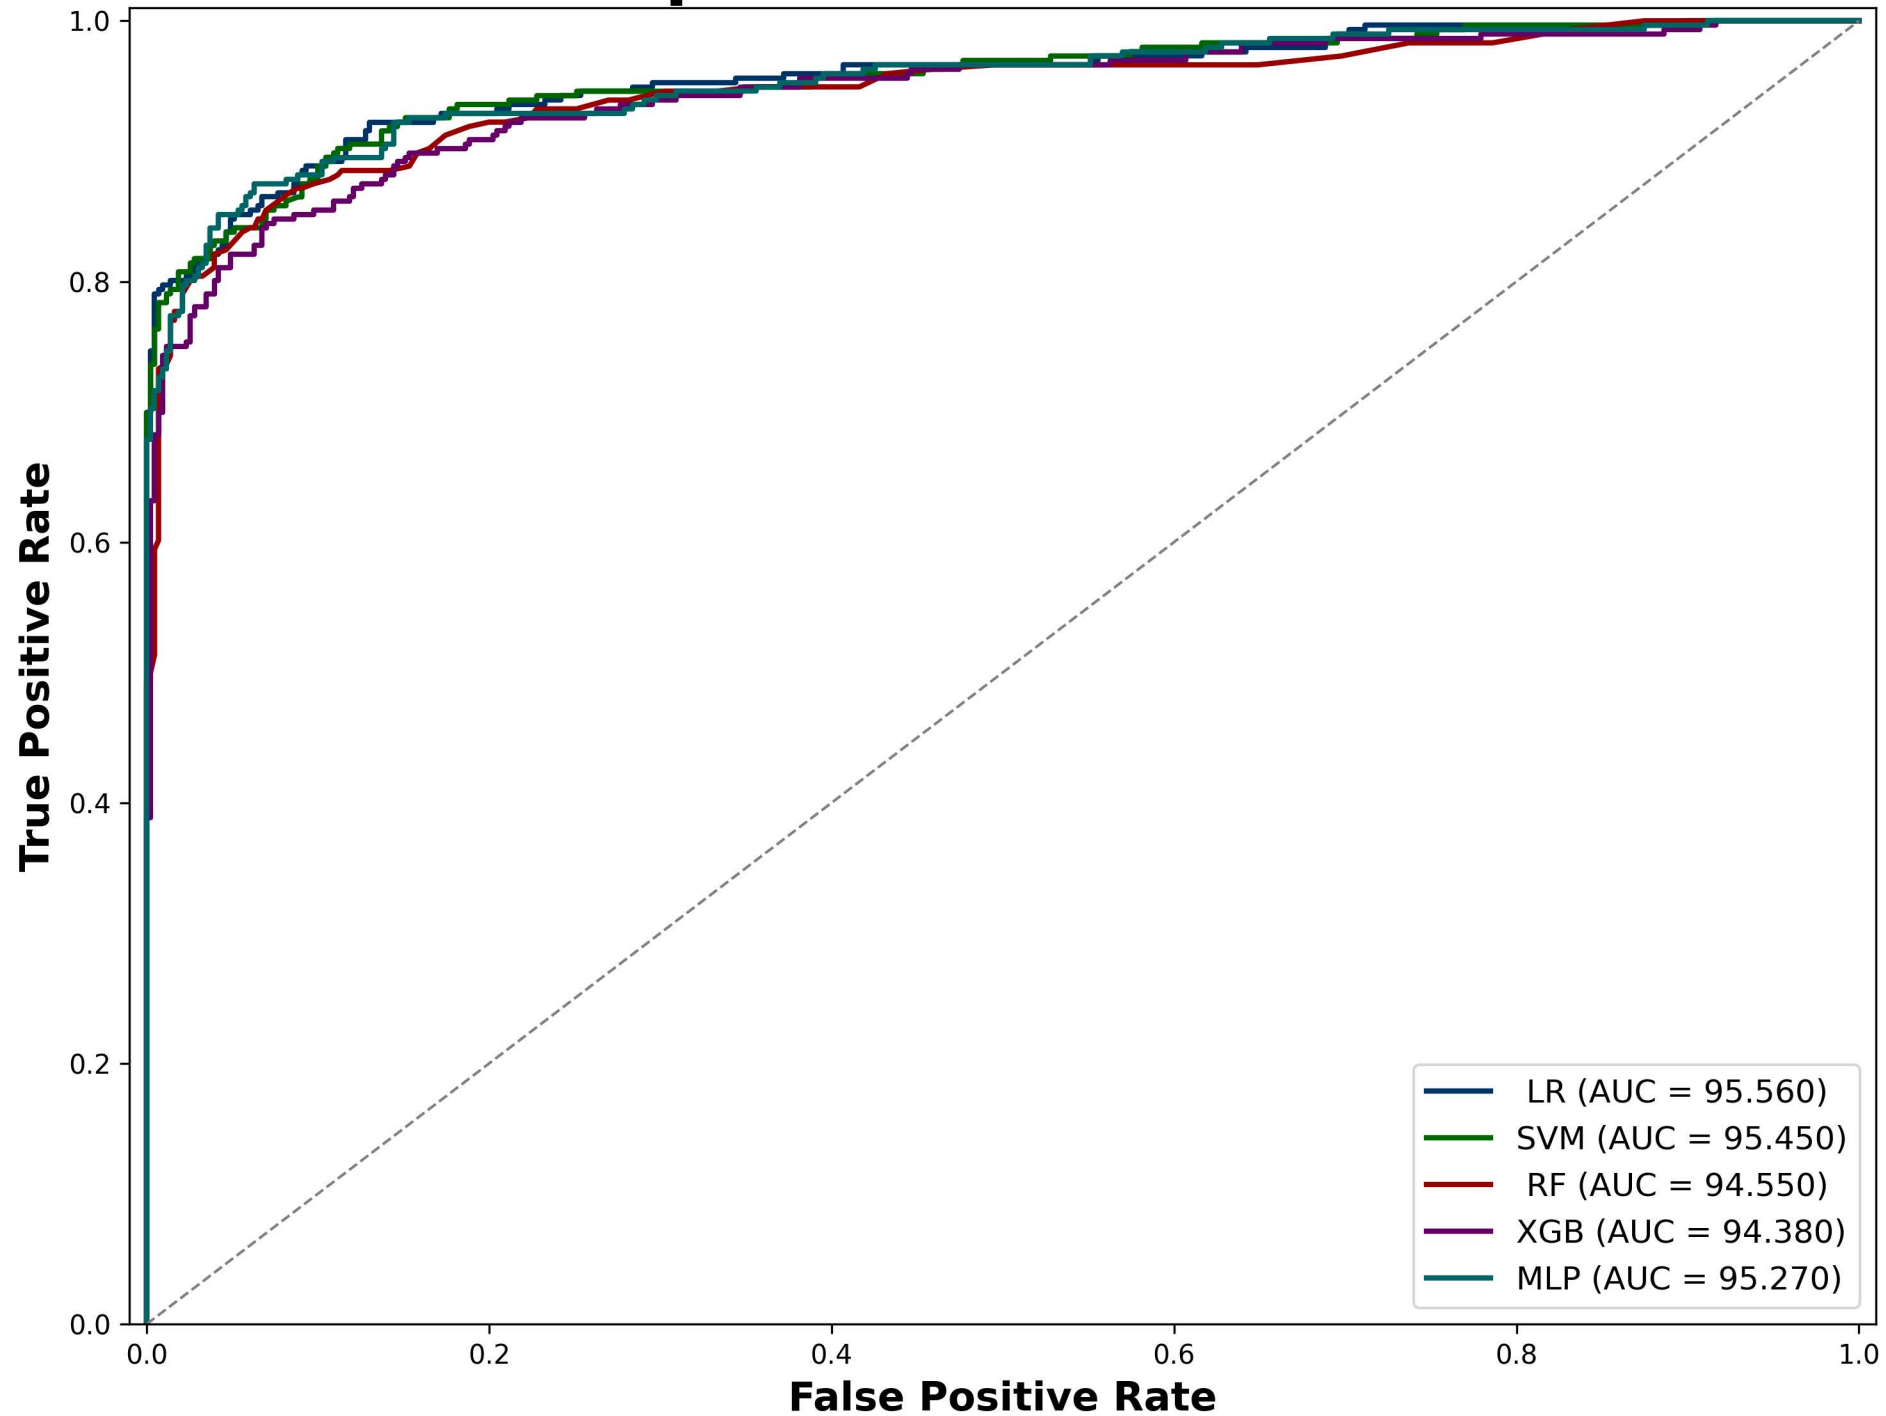

Supplement: Supplementary file 19 [file ROC_before.pdf › figures/ROC_before.pdf]

# Comparison of ROC Curves

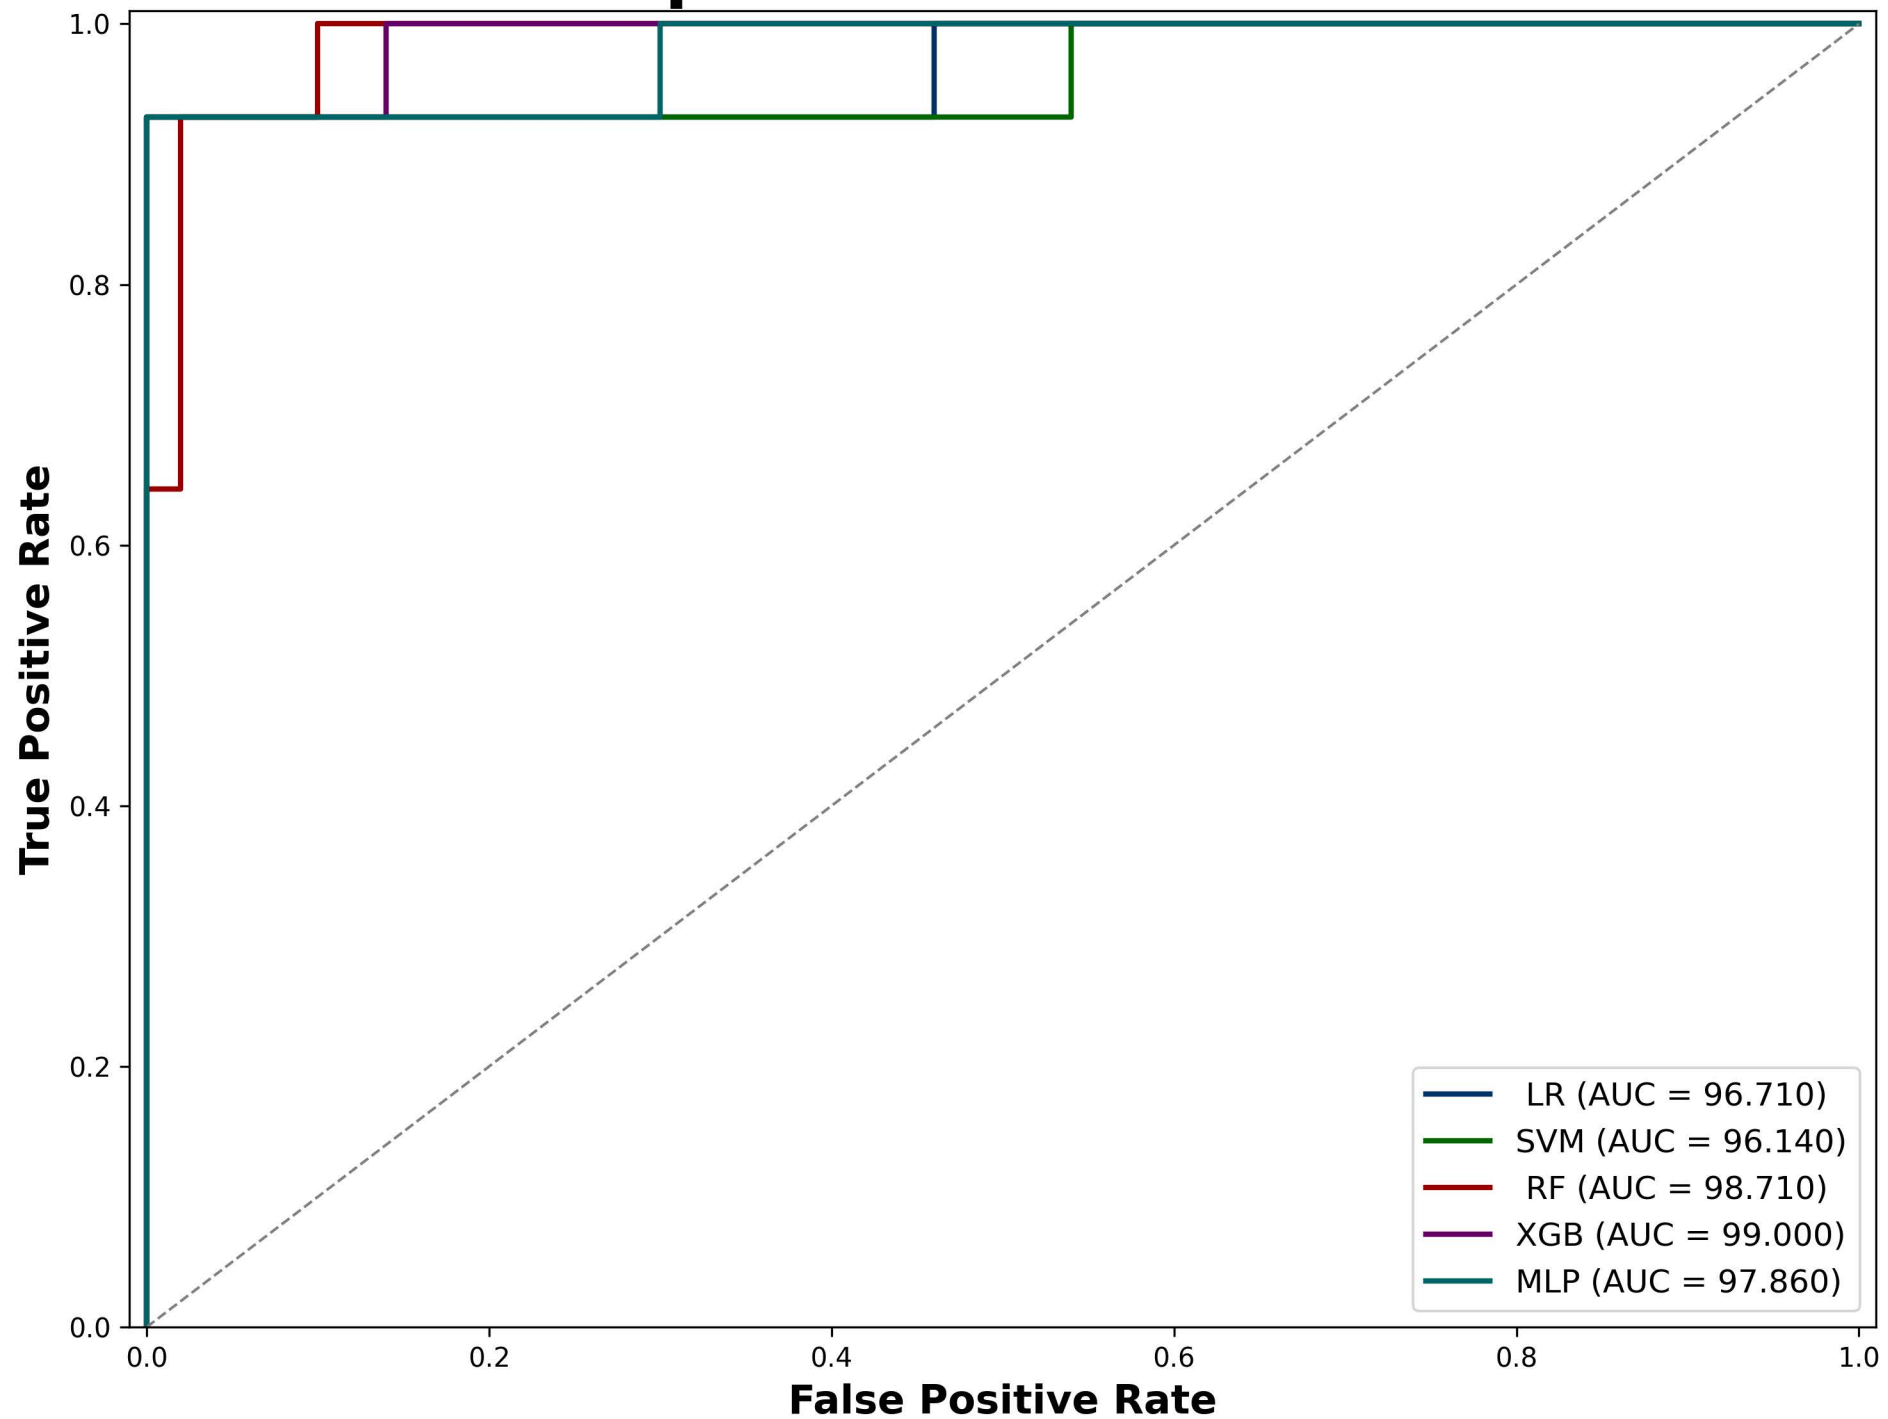

Supplement: Supplementary file 20 [file ROC_before2.pdf › figures/ROC_before2.pdf]

Combined\_Rank\_Method ( $\alpha=1$ ,  $\beta=11$  features with Max(F1)=96.27%)

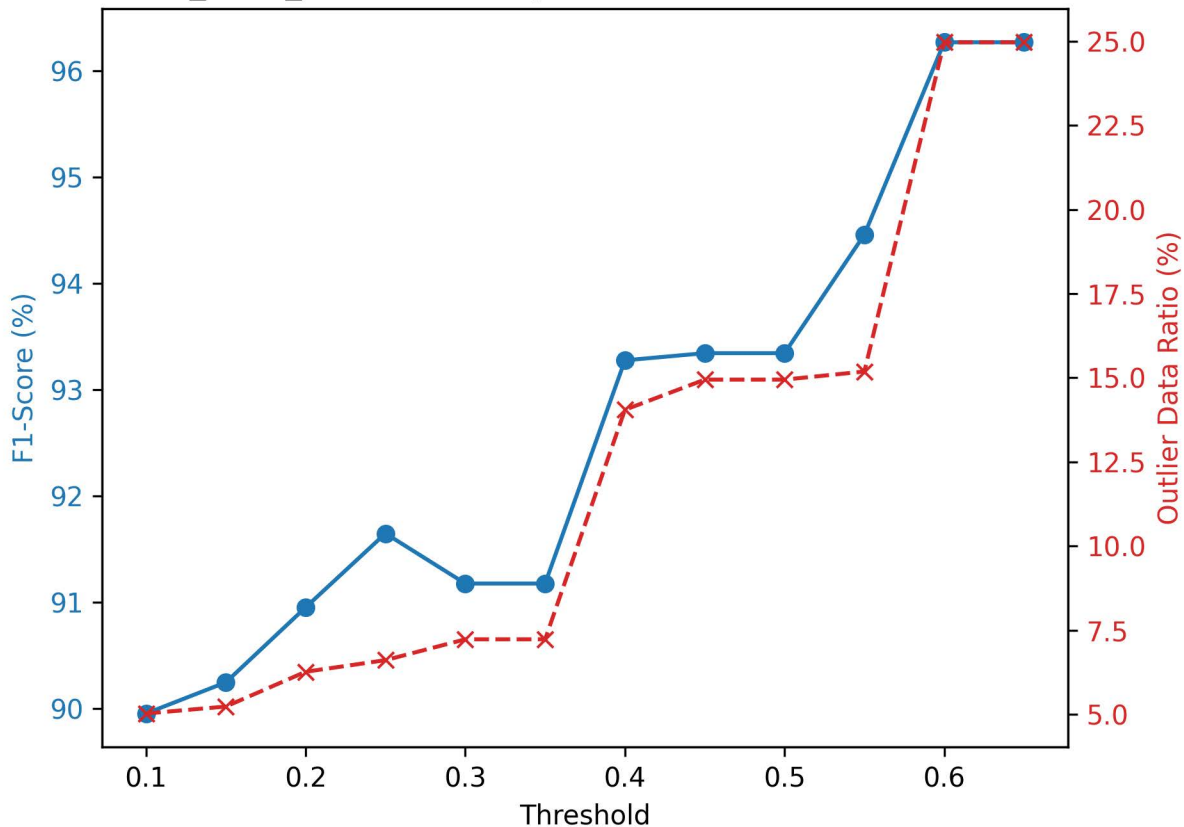

Supplement: Supplementary file 21 [file best_feature_selection_Combined_Rank_Method_0_1.pdf › figures/best_feature_selection_Combined_Rank_Method_0_1.pdf]

# Students Dropout

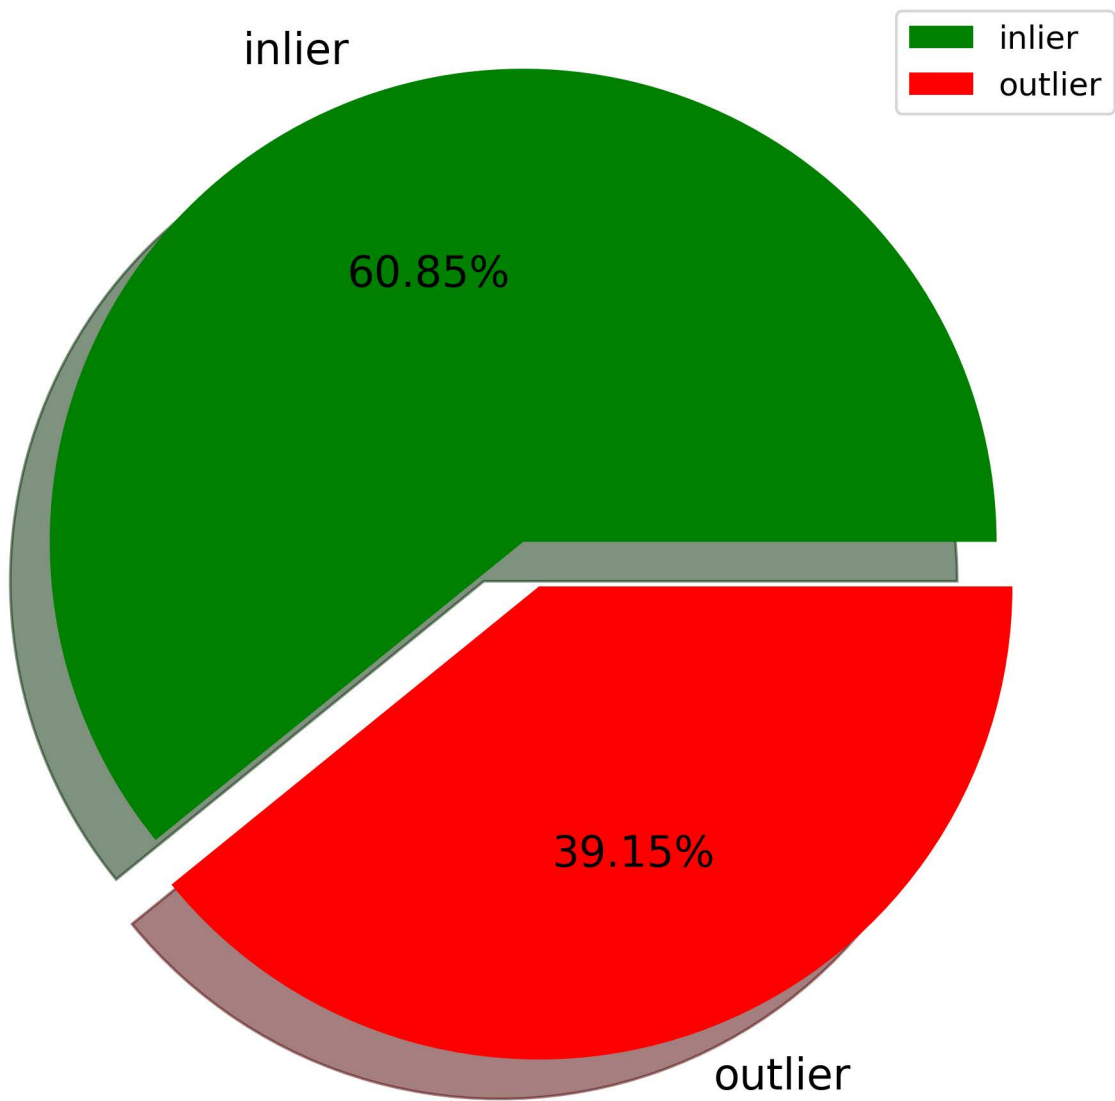

Supplement: Supplementary file 22 [file class_pie_after33.pdf › figures/class_pie_after33.pdf]

# Students Dropout

Non-dropout

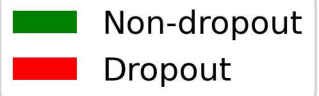

60.85%

39.15%

Dropout

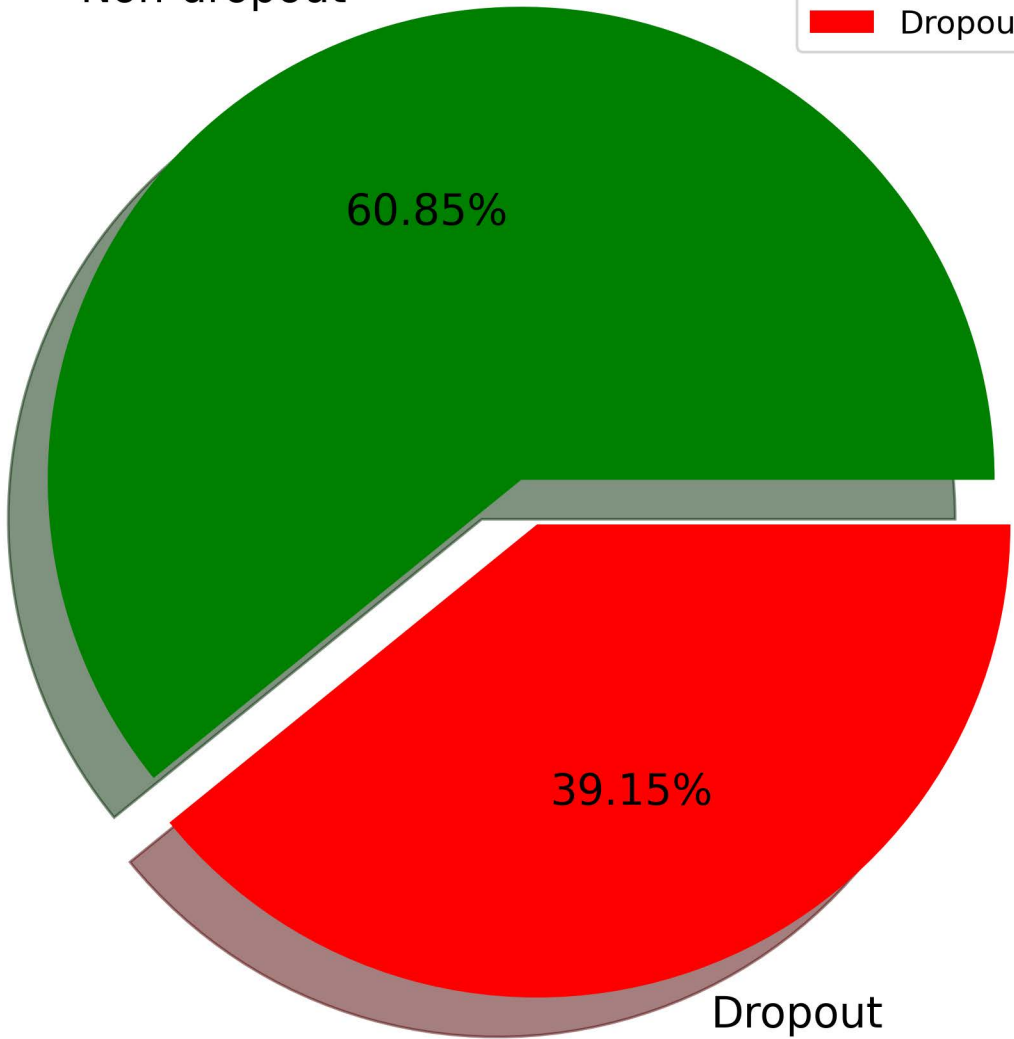

Supplement: Supplementary file 23 [file class_pie_before.pdf › figures/class_pie_before.pdf]

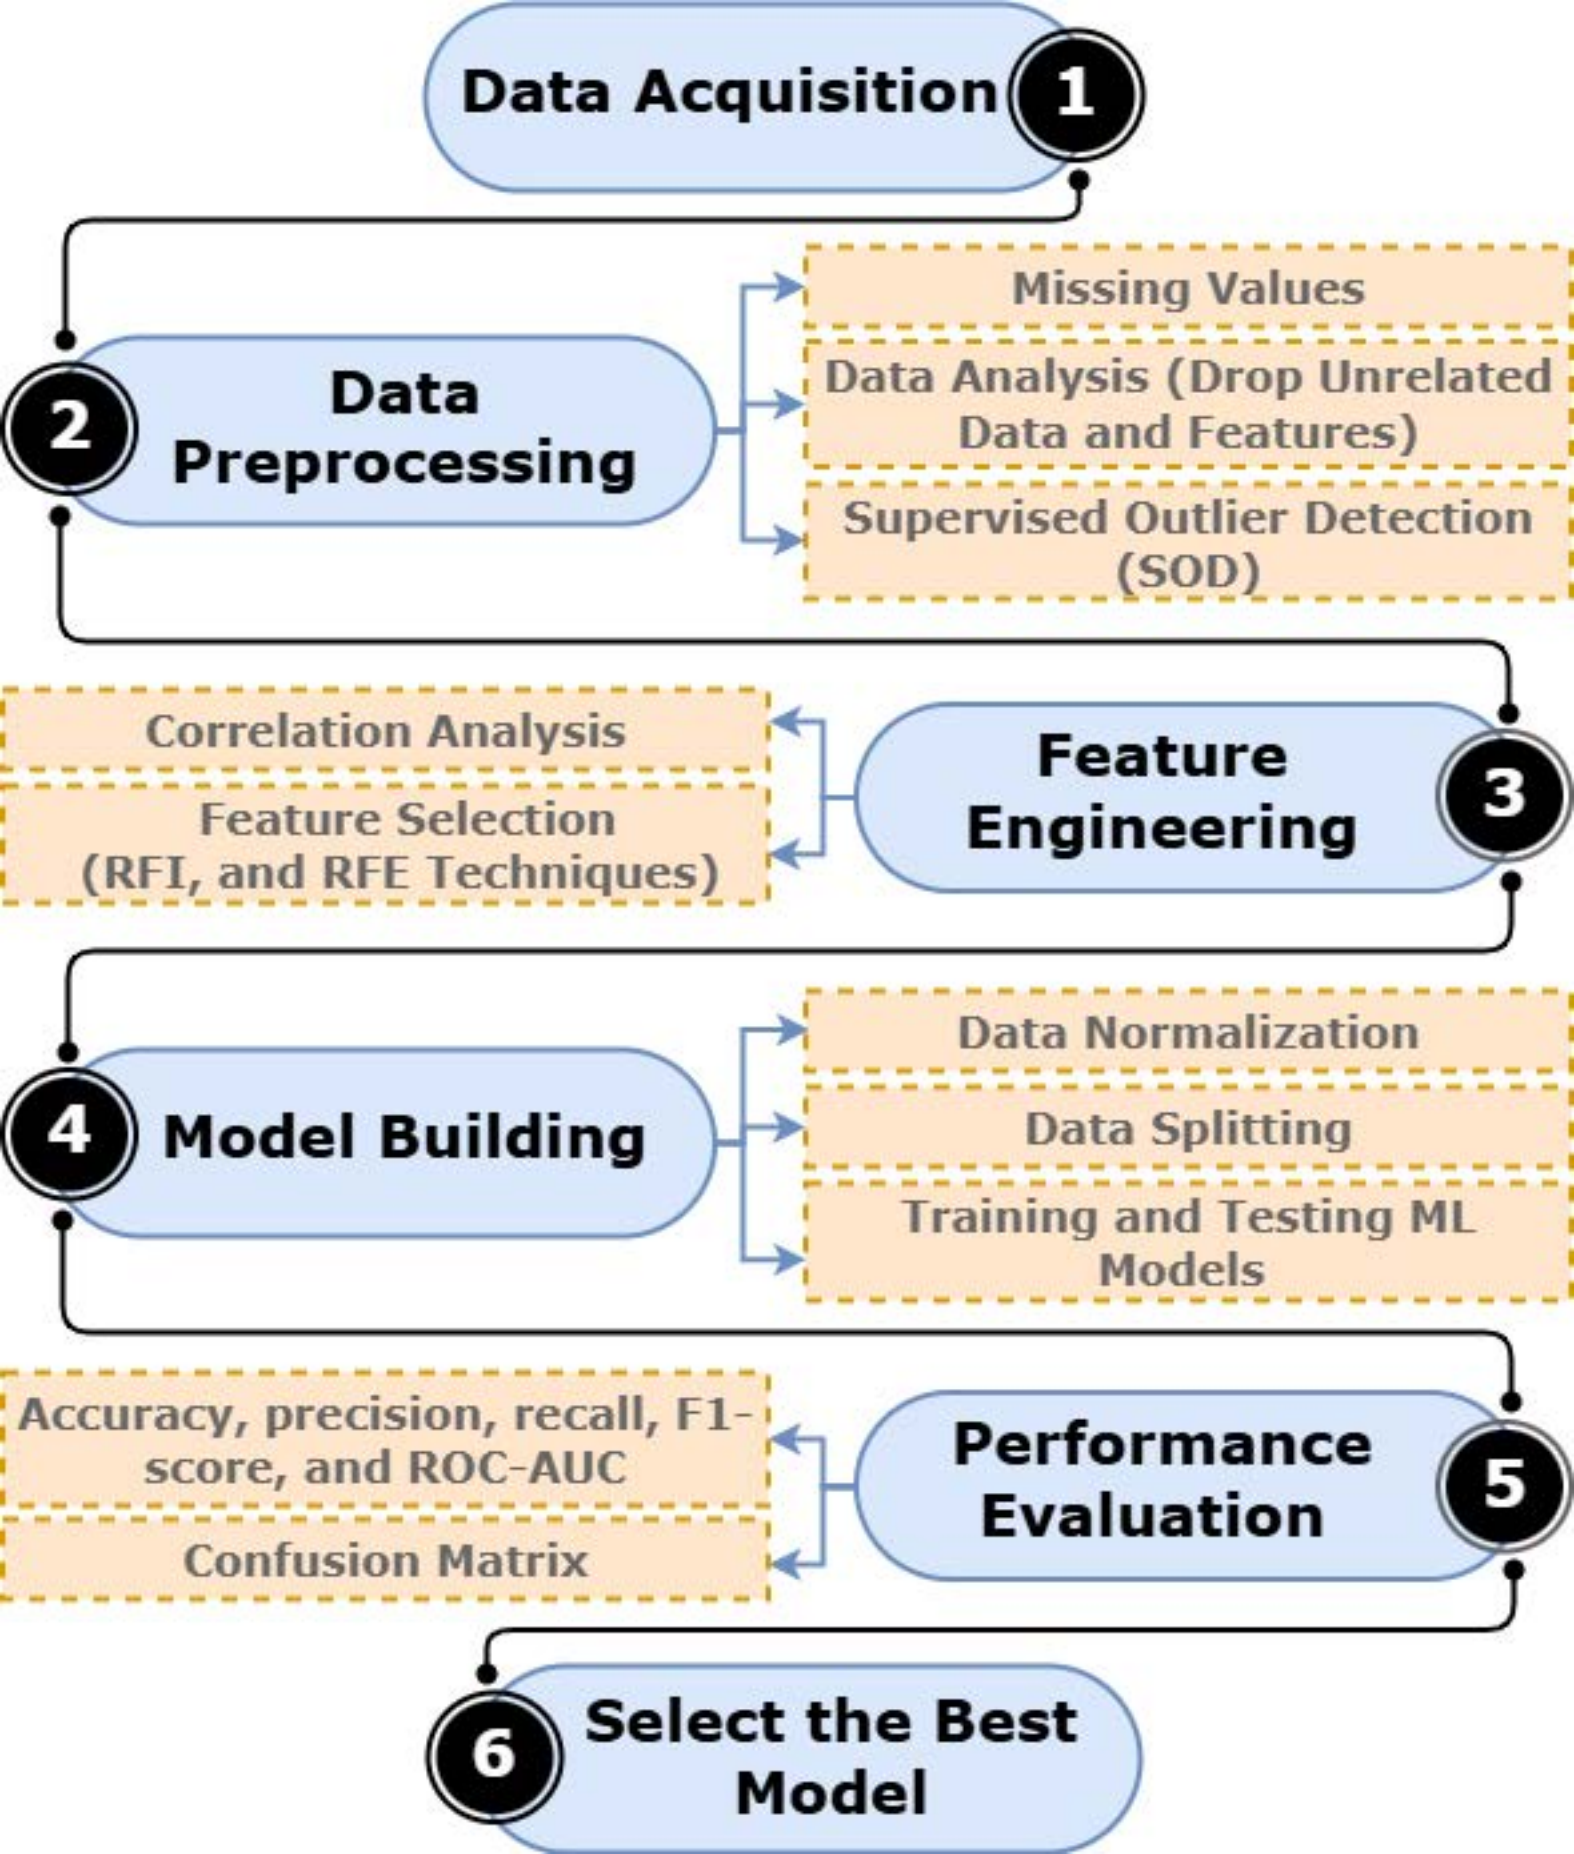

Supplement: Supplementary file 24 [file proposed approach.pdf › figures/proposed approach.pdf]
